# Supplementary material
Source: Elsevier journal article supplement (https://ftp.braindrainlan.nu/Drivers/Graphic%20Cards/ATI/ATI%20Rage%20Pro%20128/ONLINE/Polish/MMC71.pdf)
Supplement: MMC71 [file MMC71.pdf]

---

# ATI Multimedia Center 7.1

## Podręcznik użytkownika

Wersja 6.0

P/N 137-40210-60 Rev. F

© Copyright 2000 ATI Technologies Inc.

Wszystkie prawa zastrzeżone, łącznie z prawem do reprodukcji niniejszego podręcznika lub jego fragmentów, w dowolnej postaci, bez wyraźnej pisemnej zgody firmy ATI Technologies Inc.

Funkcje i dane techniczne mogą ulec zmianie bez uprzedniego powiadomienia. Znaki handlowe i zarejestrowane znaki handlowe należą do ich właścicieli:

ALL-IN-WONDER 128, ALL-IN-WONDER 128 PRO, ALL-IN-WONDER RADEON,  
RADEON VE – ATI Technologies Inc.; Athlon – Advanced Micro Devices Inc.;

CDDB – Escient; Windows – Microsoft Corp.; GuidePlus+ – Gemstar Technology Development Limited; HydraVision – Appian Graphics; Pentium, Pentium II, Pentium III, Pentium with MMX Technology – Intel Corporation.

## **Zrzeczenie się odpowiedzialności**

Producent zastrzega sobie prawo do wprowadzania zmian do niniejszego dokumentu i opisanych w nim urządzeń bez uprzedniego powiadomienia. Producent nie będzie odpowiedzialny za błędy techniczne i redakcyjne lub pominięcia w niniejszym dokumencie, ani za szkody poboczne lub wynikowe spowodowane dostarczeniem, przygotowaniem lub używaniem tych materiałów.

# Spis treści

|                                                                      |           |
|----------------------------------------------------------------------|-----------|
| <b>Korzystanie z ATI Multimedia Center . . . . .</b>                 | <b>7</b>  |
| Uruchamianie ATI Multimedia Center . . . . .                         | 8         |
| Uruchamianie z paska LaunchPad . . . . .                             | 8         |
| Uruchamianie z paska zadań Windows® . . . . .                        | 9         |
| Przyłączanie i odłączanie paneli . . . . .                           | 9         |
| Pomoc podręczna . . . . .                                            | 10        |
| <b>TV . . . . .</b>                                                  | <b>11</b> |
| Video In . . . . .                                                   | 12        |
| Konfigurowanie odtwarzacza TV . . . . .                              | 13        |
| Zmienianie rozmiaru TV . . . . .                                     | 14        |
| Menu sterowania TV . . . . .                                         | 15        |
| Ustawienia wyświetlania TV . . . . .                                 | 16        |
| Ustawienia obrazu TV . . . . .                                       | 17        |
| Ustawienia tunera TV . . . . .                                       | 18        |
| Ustawienia galerii obrazów statycznych . . . . .                     | 21        |
| Ustawianie Terminarza TV . . . . .                                   | 21        |
| ATI TV Bar . . . . .                                                 | 22        |
| Przeskakiwanie między kanałami . . . . .                             | 23        |
| Napisy kodowane . . . . .                                            | 24        |
| HotWords™ (słowa aktywacji) . . . . .                                | 26        |
| TV Magazine . . . . .                                                | 28        |
| Drugorzędna ścieżka dźwiękowa (SAP) . . . . .                        | 30        |
| Powiększanie i przesuwanie obrazu . . . . .                          | 30        |
| Pulpit obrazu wideo . . . . .                                        | 31        |
| Blokada programu . . . . .                                           | 32        |
| Zabezpieczenie przed dziećmi . . . . .                               | 33        |
| Przechwytywanie obrazu wideo oraz obrazów statycznych . . . . .      | 34        |
| <b>TV-on-Demand™ . . . . .</b>                                       | <b>36</b> |
| <b>Cyfrowy magnetowid . . . . .</b>                                  | <b>39</b> |
| Kompresja i zapisywanie przechwyconego obrazu wideo . . . . .        | 39        |
| Ustawienia Magnetowidu cyfrowego . . . . .                           | 40        |
| Kodowanie MPEG na bieżąco . . . . .                                  | 41        |
| Osiągnięcie optymalnych wyników przy nagrywaniu wideo MPEG . . . . . | 42        |
| <b>TV Listings . . . . .</b>                                         | <b>44</b> |
| Konfiguracja TV Listings . . . . .                                   | 45        |
| Nawigacja . . . . .                                                  | 46        |
| Nagrywanie . . . . .                                                 | 46        |
| Wyświetlanie . . . . .                                               | 47        |
| Widoki . . . . .                                                     | 47        |
| Opcje Filter . . . . .                                               | 48        |

|                                                             |           |
|-------------------------------------------------------------|-----------|
| Zakładka Actors .....                                       | 48        |
| Zakładka Categories .....                                   | 49        |
| Searches .....                                              | 49        |
| Favorite Search .....                                       | 49        |
| Zakładka Movies .....                                       | 50        |
| Zakładka Schedules .....                                    | 51        |
| Zakładka Searches .....                                     | 51        |
| Ustawianie parametrów wyszukiwania .....                    | 52        |
| Zakładka Sports .....                                       | 53        |
| Zakładka Stations .....                                     | 53        |
| Zakładka Titles .....                                       | 54        |
| Dni i daty .....                                            | 54        |
| <b>Galeria obrazów statycznych.....</b>                     | <b>55</b> |
| Ustawienia Galerii obrazów statycznych .....                | 55        |
| <b>CD Audio.....</b>                                        | <b>57</b> |
| Ustawienia CD Audio .....                                   | 58        |
| Baza danych CD .....                                        | 59        |
| Ustawienia Terminarza CD Audio .....                        | 60        |
| <b>Video CD .....</b>                                       | <b>61</b> |
| Menu sterowania Video CD .....                              | 62        |
| Przechwytywanie pojedynczych klatek z dysków Video CD ..... | 63        |
| Powiększanie i przesuwanie obrazu .....                     | 63        |
| Ustawienia wyświetlania Video CD .....                      | 64        |
| Ustawienia preferencji Video CD .....                       | 65        |
| Ustawienia galerii obrazów statycznych Video CD .....       | 66        |
| <b>DVD .....</b>                                            | <b>67</b> |
| Jaki materiał można odtwarzać z dysku DVD? .....            | 68        |
| Zmianie rozmiaru panelu wyświetlania wideo .....            | 68        |
| Przyciski przy wyświetlaniu na pełnym ekranie .....         | 68        |
| Odtwarzanie dysków Video DVD .....                          | 69        |
| Wybór strumieni dźwięku .....                               | 69        |
| Ustawianie napisów .....                                    | 69        |
| Korzystanie z menu .....                                    | 70        |
| Przeszukiwanie dysków DVD .....                             | 70        |
| Wybór kąta widzenia .....                                   | 70        |
| Zabezpieczenie przed dziećmi .....                          | 71        |
| Powiększanie i przesuwanie obrazu .....                     | 71        |
| Menu sterowania DVD .....                                   | 72        |
| Ustawienia wyświetlania DVD .....                           | 73        |
| Ustawienia preferencji DVD .....                            | 74        |
| Ustawienia obrazu DVD .....                                 | 75        |
| Napisy kodowane DVD .....                                   | 75        |
| Ustawienia Terminarza DVD .....                             | 76        |
| Kody regionów .....                                         | 77        |

|                                                                   |                   |
|-------------------------------------------------------------------|-------------------|
| <b>File Player</b> .....                                          | <b>78</b>         |
| Menu sterowania programu File Player .....                        | 79                |
| Powiększanie i przesuwanie obrazu .....                           | 80                |
| Ustawienia obrazu dla programu File Player .....                  | 81                |
| Ustawienia preferencji programu File Player .....                 | 82                |
| Ustawienia galerii obrazów statycznych programu File Player ..... | 82                |
| Ustawienia Terminarza programu File Player .....                  | 82                |
| <b>Terminarz</b> .....                                            | <b>83</b>         |
| Ustawienia Terminarza .....                                       | 84                |
| <b>TV Out</b> .....                                               | <b>85</b>         |
| <b>Obsługa wielu monitorów</b> .....                              | <b>86</b>         |
| <b>Teletext</b> .....                                             | <b>86</b>         |
| <b>Rozwiązywanie problemów</b> .....                              | <b>87</b>         |
| Problemy z dźwiękiem ... ..                                       | 87                |
| Problemy z obrazem... ..                                          | 91                |
| <b>Indeks</b> .....                                               | <b>Indeks - 1</b> |



---

# Korzystanie z ATI Multimedia Center

W rozdziale tym przedstawiono sposób wykorzystania specjalnych narzędzi oferowanych przez ATI Multimedia Center. Multimedia Center (Centrum multimedialne) jest pakietem produktów, które umożliwiają odtwarzanie obrazu TV, obrazu Video CD, dźwięku CD Audio, płyt DVD oraz File Player plików multimedialnych.

Ponieważ systemy telewizyjne w Ameryce Północnej i w Europie używają innych standardów kodowania sygnału telewizyjnego, opcja napisów kodowanych i powiązane opcje dostępne są jedynie w państwach Ameryki Północnej.

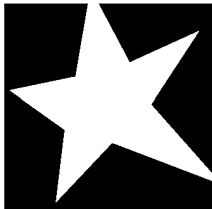

## W TYM ROZDZIALE...

- **Uruchamianie ATI Multimedia Center** na stronie 8
- **TV** na stronie 11
- **ATI TV Bar** na stronie 22
- **TV-on-Demand™** na stronie 36
- **Cyfrowy magnetowid** na stronie 39
- **TV Listings** na stronie 44
- **Galeria obrazów statycznych** na stronie 55
- **CD Audio** na stronie 57
- **Video CD** na stronie 61
- **DVD** na stronie 67
- **File Player** na stronie 78
- **Terminarz** na stronie 83
- **TV Out** na stronie 85
- **Obsługa wielu monitorów** na stronie 86
- **Teletext** na stronie 86
- **Rozwiązywanie problemów** na stronie 87

## Uruchamianie ATI Multimedia Center

### Uruchamianie z paska LaunchPad

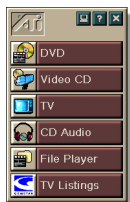

Wszystkie narzędzia Multimedia Center można wygodnie uruchamiać z Paska LaunchPad — wystarczy kliknąć dane narzędzie. Pasek LaunchPad otwiera się samoczynnie przy włączeniu komputera. Jeśli jest to niepożądane, można kliknąć pasek prawym przyciskiem myszy i w rozwijalnym menu wyłączyć opcję **Ładuj przy uruchomieniu**.

- Aby zablokować Pasek LaunchPad, kliknij go prawym przyciskiem myszy i z menu wybierz pozycję **Unieruchom**. Aby zmienić pozycję blokowania paska, kliknij unieruchomiony pasek prawym przyciskiem myszy, wybierz **Strona ►**, a następnie wybierz umiejscowienie.
- Aby zmienić rozmiar paska LaunchPad, gdy nie jest on zablokowany, kliknij go dwukrotnie lub kliknij prawym przyciskiem myszy i wybierz jego rozmiar.

Przyciski w prawej górnej części paska LaunchPad pozwalają na dostęp do ustawień pulpitu, uruchamianie Pomocy oraz zamykanie paska LaunchPad. Jeśli w systemie nie zainstalowano tunera telewizyjnego, na pasku zamiast opcji telewizji pojawia się pozycja **Video In**.

#### **Uwaga**

Programy TV, DVD, Video CD oraz File Player korzystają ze wspólnych zasobów. Uruchomienie jednego z nich w czasie gdy działa inny powoduje wyświetlenie komunikatu o konflikcie dostępu do zasobów. Są wtedy cztery możliwości:

- uruchomić oba programy z obniżoną wydajnością, jeśli jest to możliwe,
- zawiesić działanie jednego programu na czas działania drugiego,
- zamknąć pierwszy program,
- nacisnąć **Anuluj**, by nie uruchamiać drugiego programu.



## Uruchamianie z paska zadań Windows®

- 1** Na pasku zadań Windows naciśnij przycisk **Start**.
- 2** Wybierz pozycję **Programy ▶**.
- 3** Wybierz grupę **ATI Multimedia Center ▶**.
- 4** Kliknij pozycję **CD Audio, DVD, LaunchPad, File Player, TV** lub **Video CD**.

*Informacje na temat używania narzędzi  
ATI Multimedia Center można znaleźć w Pomocy  
podręcznej.*

## Przyłączanie i odłączanie paneli

Panele sterowania DVD, Video CD, TV, CD Audio oraz File Player można odłączyć od ich paneli macierzystych, przesunąć w dowolne miejsce na ekranie, a następnie z powrotem unieruchomić.

### **Aby odłączyć panel**

Przesuń wskaźnik do brzegu panelu, który chcesz odłączyć. Gdy wskaźnik dotknie brzegu panelu, zmieni się w symbol odłączania. Kliknij panel i go odciągnij.

### **Aby przyłączyć panel**

Przeciągaj panel do panelu docelowego dopóki jego obramowanie się nie zmieni, a następnie zwolnij przycisk myszy. Panele powinny się ze sobą zespolić.

## Pomoc podręczna

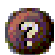

**Pomoc narzędzi.** Aby wyświetlić Pomoc podręczną, kliknij przycisk Pomoc na dowolnym z paneli okien dialogowych.

**F1**

**Pomoc kontekstowa.** Pomoc kontekstowa jest zawsze dostępna dla każdej z funkcji; wystarczy nacisnąć przycisk F1.

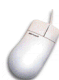

**Podpowiedzi dla narzędzi.** Aby wyświetlić opis funkcji przycisku, wystarczy przesunąć nad nim wskaźnik myszy. Po zaznajomieniu się z ATI Multimedia Center możesz zdecydować się wyłączyć tę pomoc — kliknij wtedy pole wyboru **Wyświetlaj podpowiedzi narzędzi** na zakładce **Wyświetlanie** (więcej informacji można znaleźć w rozdziale [Ustawienia wyświetlania TV](#) na stronie 16).

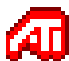

**Pomoc Pulpitu ATI.** Aby wyświetlić pomoc dotyczącą funkcji graficznych karty ATI, kliknij dwukrotnie ikonę ATI znajdującą się w prawym dolnym brzegu ekranu.

## TV

Oglądaj telewizję na monitorze komputera! Możesz odbierać do 125 programów telewizji kablowej oraz do 70 programów telewizji tradycyjnej o płynnym pełnoklatkowym obrazie na pełnym ekranie lub w oknie.

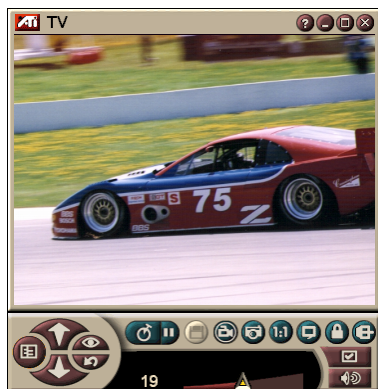

Odtwarzacz TV udostępnia szereg zaawansowanych funkcji: oglądanie napisów kodowanych, zatrzymywanie i przechwytywanie klatek wideo, przeskakiwanie między kanałami, programowanie zdarzeń, TV Listings, Zabezpieczenie przed dziećmi i inne.

Kliknięcie logo znajdującego się w lewym górnym rogu panelu wyświetla okno "Informacje...". Jeśli zainstalowano kilka narzędzi, na pasku zadań będą wyświetlane narzędzia dostępne i aktywne.

*Więcej informacji na temat korzystania z przycisków sterowania odtwarzacza TV można znaleźć w Pomocy podręcznej oraz w podpowiedziach dla narzędzi.*

### **Uwaga**

- W niektórych krajach niektóre kanały mogą nie być dostępne.
- Nie wszystkie funkcje TV mogą być dostępne w przypadku korzystania z kart z wejściem wideo.

### Aby uruchomić TV

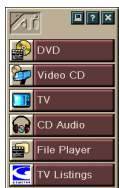

#### z paska LaunchPad

Naciśnij przycisk **TV** na pasku. Więcej informacji na temat paska LaunchPad podano na [stronie 8](#).

#### z paska zadań Windows

- 1 Naciśnij przycisk **Start** na pasku zadań Windows, następnie wybierz **Programy** ►.
- 2 Wybierz **ATI Multimedia Center** ► i pozycję **TV**.

 TV można także uruchomić z innych programów Multimedia Center zainstalowanych w komputerze — DVD, Video CD, CD Audio oraz File Player. Aby to uczynić, kliknij logo ATI w lewym górnym rogu Panelu sterowania narzędzi a następnie kliknij **TV**.

## Video In

Jeśli w systemie nie zainstalowano tunera TV, dostępny jest niewielki panel kontrolny z przyciskami sterującymi wejściami sygnałów Composite, dzięki którym można przechwytywać obraz wideo ze źródeł zewnętrznych.

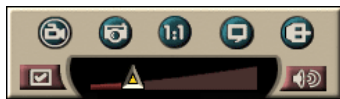

#### **Uwaga**

Przy korzystaniu z karty z wejściem wideo nie są dostępne poniższe funkcje:

- Ustawienia tunera TV (na [stronie 18](#).)
- Przeskakiwanie po kanałach (na [stronie 23](#).)
- TV-on-Demand (na [stronie 36](#).)
- Blokada programu (na [stronie 32](#).)
- Zabezpieczenie przed dziećmi (na [stronie 33](#).)

## Konfigurowanie odtwarzacza TV

Przy pierwszym uruchomieniu programu TV automatycznie włącza się Kreator inicjalizacji. Przy następnych uruchomieniach kreator nie będzie wyświetlany automatycznie, jednak można go wywołać w celu zmiany ustawień. Kreator inicjalizacji pozwala łatwo i szybko skonfigurować ustawienia kanałów telewizyjnych, ochrony przed dziećmi, dźwięku oraz TV-on-Demand.

### Uwaga

- Przy korzystaniu z karty z wejściem wideo używany jest tylko Kreator inicjalizacji dźwięku.
- Funkcja TV-on-Demande jest dostępna tylko pod warunkiem, że używana karta ją obsługuje.

## Kreator inicjalizacji

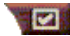

Kliknij przycisk Ustawienia a następnie przycisk **Wyświetlanie**.

Kliknij przycisk **Kreator inicjalizacji...** Wyświetlony zostanie *Kreator inicjalizacji kanałów TV*. Postępuj zgodnie ze wskazówkami, by wybrać pasmo kablowe lub antenowe, określić standard telewizyjny i wyszukać kanały.

- Jeśli zainstalowany jest składnik TV Listings z aktualną bazą danych, to każdemu znalezionemu kanałowi zostanie przypisana jego nazwa. Więcej informacji zawiera rozdział *TV Listings* na stronie 44.

Kliknij przycisk **Dalej >**. Wyświetlony zostanie *Kreator inicjalizacji zabezpieczenia przed dziećmi*. Postępuj zgodnie ze wskazówkami na ekranie, by ustawić lub zmienić hasło zabezpieczające.

### Uwaga

- Podanie hasła jest **opcjonalne**.
- W hasłach **wielkie i małe litery są rozróżniane**. Długość hasła musi wynosić przynajmniej **trzy znaki**.
- W przypadku zapomnienia hasła konieczne będzie odinstalowanie i ponowne zainstalowanie odtwarzacza TV.

Kliknij przycisk **Dalej >**. Wyświetlony zostanie *Kreator inicjalizacji dźwięku TV*. Postępuj zgodnie ze wskazówkami, by skonfigurować połączenia audio.

- Jeśli dźwięk w TV nie jest słyszalny, należy sprawdzić prawidłowość dostrojenia do kanału TV oraz poprawność połączeń audio. Więcej informacji zawiera rozdział *Rozwiązywanie problemów* na stronie 87.

Kliknij przycisk **Dalej >**. Wyświetlony zostanie *Kreator inicjalizacji TV-on-Demand*. Postępuj zgodnie ze wskazówkami, by skonfigurować plik tymczasowy i przydzielić dlań miejsce. Wskazywany będzie dostępny czas. Przycisk **Zaawansowane ustawienia** pozwala dobrać parametry jakości obrazu i obciążenia procesora.

Kliknij przycisk **Dalej >**. Wyświetlony zostanie komunikat *Kreator inicjalizacji TV zakończył pracę*. Kliknij przycisk **Zakończ**, by zakończyć konfigurację odtwarzacza TV.

### Zmianianie rozmiaru TV

Rozmiary TV można zmieniać myszą, przyciskiem maksymalizacji lub klawiszem CTRL.

- Przycisk F2 przełącza wyświetlanie panelu sterowania w celu zaoszczędzenia miejsca na pulpicie.

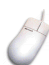

#### Aby zmienić rozmiar ekranu TV za pomocą myszy

Przeciagnij krawędź wyświetlacza. Ekran TV zachowuje ustalone proporcje wysokości do szerokości 4:3, co pozwala uniknąć zniekształceń obrazu.

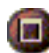

#### Aby wyświetlić obraz TV na pełnym ekranie

Naciśnij CTRL+F lub ALT+F, albo kliknij przycisk maksymalizacji. Aby powrócić do poprzedniego rozmiaru, kliknij przycisk  lub naciśnij klawisz Esc.

**Ctrl**

#### Aby przełączać między standardowymi rozmiarami obrazu TV przy użyciu klawisza CTRL

|                                                                          |                        |
|--------------------------------------------------------------------------|------------------------|
| 160 x120 pikseli                                                         | CTRL+1                 |
| 240 x180 pikseli                                                         | CTRL+2                 |
| 320 x240 pikseli                                                         | CTRL+3                 |
| 640 x480 pikseli                                                         | CTRL+4                 |
| Przełączanie między wyświetlaniem na pełnym ekranie a rozmiarem bieżącym | CTRL+F<br>ALT+F        |
| Zwiększenie rozmiaru panelu                                              | CTRL + strzałka w górę |
| Zmniejszenie rozmiaru panelu                                             | CTRL + strzałka w dół  |

## Menu sterowania TV

Parametry odtwarzacza TV są dostępne w menu wyświetlanym po kliknięciu prawym przyciskiem myszy w obrębie obrazu oraz w wygodny sposób zmiany ustawień w trybie pełnoekranowym. Menu zawiera pozycje:

|                                   |                                                                                                                                                                                                                                                |
|-----------------------------------|------------------------------------------------------------------------------------------------------------------------------------------------------------------------------------------------------------------------------------------------|
| <b>Ustawienia</b>                 | Wyświetla kartę ustawień TV.                                                                                                                                                                                                                   |
| <b>Zawsze na wierzchu</b>         | Wyświetla TV na wierzchu okien innych aplikacji.                                                                                                                                                                                               |
| <b>Ukryj przyciski sterowania</b> | Ukrywa panel sterowania TV.                                                                                                                                                                                                                    |
| <b>Powiększanie</b>               | Pozwala wybrać stopień powiększenia ( <b>2x</b> , <b>4x</b> lub <b>8x</b> ) lub <b>zmniejszyć</b> ewentualne powiększenie. Patrz <a href="#">Powiększanie i przesuwanie obrazu</a> na stronie 30.                                              |
| <b>Rozmiar wideo</b>              | Przełącza między dostępnymi rozmiarami panelu:<br><b>160 x 120</b><br><b>240 x 180</b><br><b>320 x 240</b><br><b>640 x 480</b><br><b>Pełny ekran</b>                                                                                           |
| <b>Złącze</b>                     | Określa źródło sygnału wideo:<br><b>Tuner TV</b> Wybiera wejście z tunera TV.<br><b>Composite</b> Wybiera wejście wideo Composite.<br><b>S-Video</b> Wybiera wejście S-Video.                                                                  |
| <b>Tryb dźwięku</b>               | Określa tryb audio:<br><b>Napisy przy wyciszonym dźwięku</b> Wyświetla kodowane napisy przy wyciszonym dźwięku.<br><b>Stereo</b> Włącza dźwięk stereo.<br><b>Mono</b> Włącza dźwięk mono.<br><b>SAP</b> Włącza alternatywną ścieżkę dźwiękową. |
| <b>Napisy kodowane</b>            | Określa sposób wyświetlania napisów kodowanych. Można także włączyć funkcje HotWords oraz TV Magazine. Patrz <a href="#">HotWords™ (słowa aktywacji)</a> na stronie 26 i <a href="#">TV Magazine</a> na stronie 28.                            |
| <b>Informacje...</b>              | Wyświetla okno Informacje...                                                                                                                                                                                                                   |
| <b>Zakończ</b>                    | Zamyka TV.                                                                                                                                                                                                                                     |

## Ustawienia wyświetlania TV

Strona Ustawień wyświetlania pozwala na sterowanie wyświetlaniem obrazu przez TV.

### Aby wyświetlić stronę Ustawienia wyświetlania

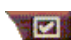

Naciśnij przycisk Ustawienia w panelu sterowania TV, a następnie wybierz kartę **Wyświetlanie**.

|                                      |                                                                                                                                                                                                                                                                                                                                                                                                                                                                                                                                                                        |
|--------------------------------------|------------------------------------------------------------------------------------------------------------------------------------------------------------------------------------------------------------------------------------------------------------------------------------------------------------------------------------------------------------------------------------------------------------------------------------------------------------------------------------------------------------------------------------------------------------------------|
| <b>Rozmiar ekranu</b>                | Wyświetla rozmiary dostępne dla bieżącego panelu. Jeśli nie można zmieniać rozmiarów bieżącego panelu, wartości te nie będą dostępne.                                                                                                                                                                                                                                                                                                                                                                                                                                  |
| <b>Podpowiedzi narzędzi</b>          | <p><b>Wyświetlaj podpowiedzi narzędzi</b><br/>Przy wskazaniu przycisku myszą wyświetla pomocne podpowiedzi dotyczące używania TV.</p> <p><b>Wyświetlaj klawisz skrót</b><br/>Wyświetla klawisze skrót przy wskazaniu przycisku.</p>                                                                                                                                                                                                                                                                                                                                    |
| <b>Parametry wyświetlania</b>        | <p><b>Pulpit obrazu wideo</b><br/>Przy minimalizacji TV zamiast tapety pulpitu jest wyświetlany obraz TV.</p> <p><b>Stały współczynnik kształtu obrazu</b><br/>Wybierz tę opcję, aby zachować stały kształt obrazu przy zmianie rozmiaru lub powiększaniu obrazu.</p> <p><b>Obcinanie brzegów</b><br/>Obcina krawędzie obrazu, by ukryć szum wizyjny.</p> <p><b>Zawsze na wierzchu</b><br/>Wyświetla TV zawsze na wierzchu.</p> <p><b>Automatyczne ukrywanie przycisków przy pełnym ekranie</b><br/>Ukrywa elementy sterujące TV przy wyświetlaniu pełnoekranowym.</p> |
| <b>Klawisz ukrywania Odtwarzacza</b> | Klawisz przełączania wyświetlania TV.                                                                                                                                                                                                                                                                                                                                                                                                                                                                                                                                  |
| <b>Kreator inicjalizacji</b>         | Ponownie uruchamia Kreatora inicjalizacji. Patrz <a href="#">Kreator inicjalizacji</a> na stronie 13.                                                                                                                                                                                                                                                                                                                                                                                                                                                                  |



## Ustawienia obrazu TV

Karta ustawień wideo pozwala wybrać źródło sygnału wideo oraz ustawić parametry obrazu.

### Aby wyświetlić kartę ustawień wideo

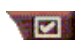

Naciśnij przycisk Ustawienia w panelu sterowania TV, a następnie wybierz kartę **Wideo**.

|                           |                                                                                                                                                                                                                                                                                                                                                                                                                                            |
|---------------------------|--------------------------------------------------------------------------------------------------------------------------------------------------------------------------------------------------------------------------------------------------------------------------------------------------------------------------------------------------------------------------------------------------------------------------------------------|
| <b>Złącze</b>             | Wybierz wejście kablowe, composite lub S-Video. <ul style="list-style-type: none"> <li>Przy wybranej opcji Composite lub S-Video konieczne jest określenie opcji <b>Standard nadawania</b>.</li> </ul>                                                                                                                                                                                                                                     |
| <b>Standard nadawania</b> | Wybierz jeden ze standardów: NTSC, PAL lub SECAM.                                                                                                                                                                                                                                                                                                                                                                                          |
| <b>Właściwości wideo</b>  | <p><b>Kolor</b><br/>Pozwala dobrać nasycenie koloru w obrazie.</p> <p><b>Jaskrawość</b><br/>Pozwala dobrać ilość bieli w obrazie.</p> <p><b>Kontrast</b><br/>Pozwala dobrać gradację tonów między obszarami jasnymi i ciemnymi.</p> <p><b>Odcień</b><br/>Pozwala dobrać równowagę czerwieni i niebieskiego w obrazie.</p> <ul style="list-style-type: none"> <li>Regulacja odcienia nie jest możliwa w standardach PAL i SECAM.</li> </ul> |

## Ustawienia tunera TV

Na stronie ustawień tunera TV można przeszukiwać aktywne stacje TV, wybierać pasmo kablowe lub antenowe, nadawać programom nazwy oraz ustawiać opcje specyficzne dla kanałów.

### Aby wyświetlić stronę ustawień tunera

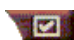

Naciśnij przycisk Ustawienia na panelu sterowania TV, a następnie wybierz kartę **Tuner TV**.

|                                            |                                                                                                                                                                                                |
|--------------------------------------------|------------------------------------------------------------------------------------------------------------------------------------------------------------------------------------------------|
| <b>Nazwa kanału</b>                        | Tu można wprowadzać nazwy kanałów.                                                                                                                                                             |
| <b>Szczegóły...</b>                        | Po wybraniu kanału można kliknąć przycisk <b>Szczegóły...</b> , by wyświetlić kartę <b>Zaawansowane parametry kanału</b> (patrz <a href="#">Zaawansowane parametry kanałów</a> na stronie 18). |
| <b>Automatyczne wyszukiwanie</b>           | Wyszukuje wszystkie aktywne kanały TV i zapisuje je po kliknięciu przycisku <b>Ustaw</b> .                                                                                                     |
| <b>Standard sygnału telewizji kablowej</b> | Pozwala wybrać kraj i format kablowy lub antenowy.                                                                                                                                             |

### Zaawansowane parametry kanałów

Przy wyborze kanału i kliknięciu przycisku **Szczegóły...** na stronie ustawień tunera TV zostanie wyświetlona strona Zaawansowanych parametrów kanału, na której można ustawić parametry poszczególnych kanałów — listę ulubionych programów, przypisanie kanałów, jak również właściwości dźwięku, obrazu, blokady programu oraz napisów kodowanych.

Na przykład, na karcie Ustawienia specyficzne dla kanału można wybrać dla pojedynczego kanału standard SECAM, pozostawiając wszystkie inne kanały w domyślnym standardzie PAL. Na stronie Napisy kodowane można włączyć zestaw słów aktywnych specjalnie dla danego kanału.

|                                            |                                                                                                                                                                                                                                                                                                                                                                                                                                                                                                                                                                                                                                                                                                                                                     |
|--------------------------------------------|-----------------------------------------------------------------------------------------------------------------------------------------------------------------------------------------------------------------------------------------------------------------------------------------------------------------------------------------------------------------------------------------------------------------------------------------------------------------------------------------------------------------------------------------------------------------------------------------------------------------------------------------------------------------------------------------------------------------------------------------------------|
| <b>Nazwa kanału</b>                        | Podaj nazwę programu.                                                                                                                                                                                                                                                                                                                                                                                                                                                                                                                                                                                                                                                                                                                               |
| <b>Numer</b>                               | Wyświetla numer kanału.                                                                                                                                                                                                                                                                                                                                                                                                                                                                                                                                                                                                                                                                                                                             |
| <b>Przypisany jest do stacji</b>           | Określ program TV, który będzie wyświetlany przy wyborze danego kanału. Można na przykład przypisać rzeczywisty program 5 kanałowi 2 w telewizorze. Procedura automatycznego wyszukiwania przywraca normalne przyporządkowanie kanałów (patrz <a href="#">Automatyczne wyszukiwanie</a> na stronie 18).                                                                                                                                                                                                                                                                                                                                                                                                                                             |
| <b>Program na liście Ulubionych</b>        | Zaznacz to pole, aby dodać program do listy programów telewizji, między którymi można przechodzić przyciskami góra/dół. Aby usunąć kanał, wystarczy cofnąć zaznaczenie.                                                                                                                                                                                                                                                                                                                                                                                                                                                                                                                                                                             |
| <b>Program na liście Wyboru wizualnego</b> | Zaznacz to pole, aby dodać kanał do Listy wyboru wizualnego (patrz <a href="#">Przeskakiwanie między kanałami</a> na stronie 23). Aby usunąć kanał, wystarczy cofnąć zaznaczenie.                                                                                                                                                                                                                                                                                                                                                                                                                                                                                                                                                                   |
| <b>Ustawienia specyficzne dla kanału</b>   | <p><b>Dźwięk</b><br/>Naciśnij <b>Dźwięk</b>, a następnie <b>Szczegóły...</b> aby wyświetlić stronę z parametrami dźwięku.</p> <p><b>Ustawienia wyciszania</b></p> <p><b>Globalne</b> Stosuje ustawienia globalne dla wszystkich kanałów.</p> <p><b>Wycisz. wł.</b> Wycisza bieżący kanał</p> <p><b>Wycisz. wył.</b> Anuluje wszystkie wyciszenia</p> <p><b>Ustawienia SAP</b> patrz <a href="#">Drugorzędna ścieżka dźwiękowa (SAP)</a> na stronie 30.</p> <p><b>Globalne</b> Stosuje ustawienia globalne dla wszystkich kanałów, które na to pozwalają.</p> <p><b>Stereo</b> Włącza ewentualny sygnał stereo dla danego programu,</p> <p><b>Mono</b> Włącza sygnał mono dla danego programu.</p> <p><b>SAP</b> Włącza SAP dla danego programu.</p> |

### Ustawienia specyficzne dla kanału

#### Obraz wideo

Naciśnij **Obraz wideo**, a następnie naciśnij **Szczegóły...** aby wyświetlić stronę Ustawienia obrazu specyficzne dla kanału. Zmiana ustawień odbywa się za pomocą suwaków.

|                   |                                                               |
|-------------------|---------------------------------------------------------------|
| <b>Kolor</b>      | Nasycenie koloru w obrazie.                                   |
| <b>Jaskrawość</b> | Równowaga obszarów jasnych i ciemnych w obrazie.              |
| <b>Kontrast</b>   | Gradacja tonów między obszarami jasnymi, średnimi i ciemnymi. |
| <b>Odcień</b>     | Równowaga między kolorem czerwonym, zielonym i niebieskim.    |

#### Standard nadawania

Wybierz standard nadawania dla tego kanału.

#### Blokada programu

Naciśnij **Blokada programu**, następnie **Szczegóły...** aby wyświetlić stronę Blokadę programu (patrz [Blokada programu](#) na stronie 32).

#### Napisy kodowane

Naciśnij **Napisy kodowane**, następnie **Szczegóły...** aby wyświetlić stronę Ustawienia napisów kodowanych dla programu (patrz [Napisy kodowane](#) na stronie 24).

## Ustawienia galerii obrazów statycznych

Możliwe jest przechwytywanie klatek obrazu TV i zapisywanie ich w galerii obrazów statycznych.

### Aby wyświetlić kartę ustawień galerii obrazów statycznych

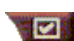

Naciśnij przycisk Ustawienia na panelu sterowania TV, a następnie wybierz kartę **Galeria obrazów statycznych**. Informacje na temat galerii obrazów statycznych zawiera rozdział *Galeria obrazów statycznych* na stronie 55.

## Ustawianie Terminarza TV

Terminarz pozwala skonfigurować odtwarzacz TV w taki sposób, by móc oglądać lub nagrywać wybrane programy telewizyjne we wskazanym terminie. W przypadku zainstalowania odpowiednich programów, zdarzenia w terminarzu można planować także dla CD Audio, TV Magazine, Magnetowidu cyfrowego i programu File Player.

### Aby wyświetlić stronę ustawień Terminarza TV



Naciśnij przycisk Ustawienia na panelu sterowania TV, następnie wybierz kartę **Terminarz**, po czym kliknij przycisk **Utwórz nowy**. Kreator Terminarza pomoże w utworzeniu nowych zdarzeń w terminarzu. Szczegółowe informacje zawiera rozdział *Terminarz* na stronie 83.

## ATI TV Bar

Możesz teraz żeglować po Internecie oglądając jednocześnie telewizję, bez żonglowania oknami! ATI TV Bar wyświetla obraz TV w przeglądarce Internet Explorer.

Użytkownicy w Stanach Zjednoczonych mogą także wyświetlać nazwy i numery kanałów oraz stale aktualizowaną informację o programie.

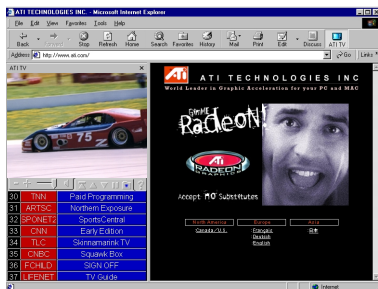

### Aby wyświetlić ATI TV Bar

- 1 Uruchom program Internet Explorer
- 2 Z paska menu programu Eksplorator wybierz **Widok** ►, wskaż **Pasek eksploratora** ►, a następnie kliknij **ATI TV**.

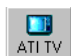

Lub kliknij przycisk ATI TV na pasku menu Eksploratora.

- ATI TV Bar włącza okno TV, jeśli nie jest ono aktywne, i wyświetla je w pasku TV Bar. Okno TV zostaje zamknięte przy zamknięciu ATI TV Bar.
- Jeśli okno TV jest aktywne, zostaje ono zamknięte, a obraz TV jest wyświetlany w pasku TV Bar. Przy zamknięciu programu TV Bar obraz TV zostaje wyświetlany ponownie w normalnym oknie.
- Obraz TV automatycznie dopasowuje swój rozmiar przy zmianie rozmiaru okna programu Explorer.

### Przyciski sterujące ATI TV Bar

Przyciski paska ATI TV od lewej do prawej to:

Kanał w dół, Kanał w górę, Głośność, Wycisz, Przejdź do początku, Strona w górę, Strona w dół, Zatrzymaj przewijanie, Ulubione oraz Pomoc.

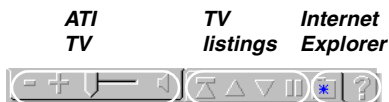

## Przeskakiwanie między kanałami

Można oglądać kilka programów TV jednocześnie oraz wybierać kanały poprzez kliknięcie miniaturowego obrazka danego programu. Każde okienko podglądu wyświetla numer kanału, a jego obraz jest regularnie odświeżany.

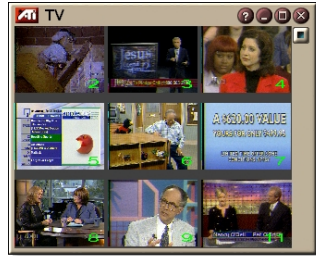

- Jeśli dany program na liście wyboru jest programem zablokowanym (patrz rozdział *Blokada programu* na stronie 32), to do przejścia do niego wymagane jest hasło. Jeśli nie wprowadzi się hasła, wyświetlane będą jedynie programy nie zablokowane.
- Po zakończeniu automatycznego wyszukiwania (patrz *Automatyczne wyszukiwanie* w rozdziale *Automatyczne wyszukiwanie* na stronie 18), na liście wyboru umieszczone zostaną wszystkie wykryte programy. Po lewej stronie ikony blokady pojawi się lupa. Kliknięcie lupy powoduje dodanie lub usunięcie programu z listy wyboru.
- W tym trybie podglądu większość przycisków jest niedostępna.

### Aby użyć funkcji przeskakowania między kanałami

- 1  Kliknij przycisk Przeskakowanie po kanałach na panelu sterowania TV.  
*Na ekranie TV pojawi się siatka miniaturowych okien programów.*
- 2 Kliknij daną ikonę, aby podglądać dany program.  
*Naciśnięty program się uaktywnia i odtwarza obraz i dźwięk przez kilka sekund.*
- 3 Aby włączyć wyświetlanie danego programu kliknij dwukrotnie jego miniaturę.  
*Siatka miniatur zniknie, a na ekranie pojawi się wybrany program.*

## Napisy kodowane

Napisy kodowane można wyświetlać na wierzchu okna obrazu wideo, tak jak w zwykłym TV, lub w osobnym oknie obok okna z obrazem. Przy wyświetlaniu napisów w osobnym oknie można paskiem przewijania przeglądać kilka ostatnich minut tekstu, a także ustawić kolor tła, czcionkę oraz kolor czcionki tego okna.

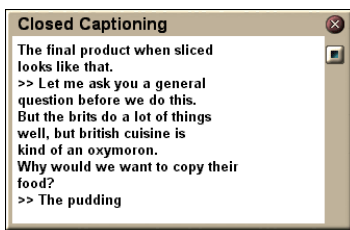

**Uwaga** Funkcja napisów kodowanych jest dostępna tylko w Ameryce Północnej.

### Aby wyświetlić tekst napisów kodowanych

-  Kliknij przycisk Napisy kodowane na panelu sterowania TV.
-  Aby zamknąć okno napisów kodowanych, kliknij przycisk zamknięcia.

### Ustawienia napisów kodowanych

Strona z ustawieniami napisów kodowanych pozwala określić sposób wyświetlania tekstu napisów kodowanych: na wierzchu okna z obrazem wideo lub w osobnym oknie, kolor tła, czcionkę oraz kolor czcionki w oknie. Można tu także ustawić i włączyć narzędzie HotWords oraz TV Magazine.



## Aby skonfigurować napisy kodowane

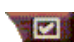

Naciśnij przycisk Ustawienia na panelu sterowania TV, a następnie wybierz kartę **Napisy kodowane**.

|                                                   |                                                                                                                                                                                                                                                                                                                                                                                                                                                                                                |
|---------------------------------------------------|------------------------------------------------------------------------------------------------------------------------------------------------------------------------------------------------------------------------------------------------------------------------------------------------------------------------------------------------------------------------------------------------------------------------------------------------------------------------------------------------|
| <p><b>Umiejscowienie</b></p>                      | <p><b>Okno zewnętrzne</b><br/>Wyświetla tekst napisów kodowanych w osobnym oknie. Przyciskiem <b>Czcionka...</b> wybierz czcionkę wyświetlania.</p> <p><b>Okno obrazu wideo</b><br/>Wyświetla tekst napisów kodowanych na wierzchu okna obrazu wideo. Naciśnij <b>Czcionka...</b>, aby wybrać czcionkę wyświetlania.</p> <p><b>Tło pełne</b><br/>Wyświetla tekst napisów kodowanych na pełnym tle.</p> <p><b>Tło cieniowane</b><br/>Wyświetla tekst napisów kodowanych na cieniowanym tle.</p> |
| <p><b>HotWords (słowa aktywacji)</b></p>          | <p><b>Włącz</b><br/>Zaznacz tę opcję, aby włączyć HotWords przy włączonych Napisach kodowanych (patrz <a href="#">HotWords™ (słowa aktywacji)</a> na stronie 26).</p> <p><b>Ustawienia HotWords</b><br/>Wyświetla stronę ustawień HotWords.</p>                                                                                                                                                                                                                                                |
| <p><b>TV Magazine</b></p>                         | <p><b>Włącz</b><br/>Włącza TV Magazine (patrz <a href="#">TV Magazine</a> na stronie 28.)</p> <p><b>Ustawienia TV Magazine</b><br/>Wyświetla Kreator ustawiania TV Magazine .</p>                                                                                                                                                                                                                                                                                                              |
| <p><b>Tekst kodowany przy wyciszeniu</b></p>      | <p>Wyświetla tekst kodowany przy wyciszeniu.</p>                                                                                                                                                                                                                                                                                                                                                                                                                                               |
| <p><b>Wyświetl ewentualny tekst zastępczy</b></p> | <p>Jeśli w strumieniu danych napisów kodowanych obecny jest tekst trybu T1, to zaznaczenie tego pola wyświetla pełną stronę kodowanego i przewijalnego tekstu w trybie T1. Jeśli wyłączone zostaną napisy kodowane lub programy zostaną zmienione, to strona ta będzie ukryta.</p>                                                                                                                                                                                                             |

## HotWords™ (słowa aktywacji)

Wyłącz się komputerem przy oglądaniu telewizji! Dzięki funkcji HotWords możesz określić słowa i zwroty, które będą wykrywane przez TV w tekście napisów kodowanych.

Można ustawić narzędzie HotWords tak, aby przy wykryciu sekwencji słów wyświetlać pasujący tekst, przywracać TV, odtwarzać dźwięk, włączać TV Magazine lub Magnetowid cyfrowy. TV może rozpocząć także automatyczną transkrypcję tekstu po wystąpieniu podanego słowa.

Można uaktywnić funkcję HotWords, a następnie zmniejszyć okno TV do ikony, a gdy w tekście pojawi się dane słowo, okno TV zostanie automatycznie przywrócone. Słowa HotWords można ustawiać przyciskiem Ustawienia HotWords na stronie ustawień Napisów kodowanych.

***Uwaga***

Funkcja HotWords jest dostępna tylko w Ameryce Północnej.

## Aby ustawić HotWords

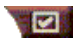

Naciśnij przycisk Ustawienia na panelu sterowania TV, następnie wybierz kartę **Napisy kodowane** i przycisk **Ustawienia HotWords**. Zostanie wyświetlony Kreator HotWords.

Aby włączyć narzędzie HotWords zaznacz pole **Włącz**. Kreator HotWords pomoże w ustawieniu tego narzędzia.

|                                                                                       |                                                                                                                                                                                                                                                                                                                                                                                                                                                                                                                                                                |
|---------------------------------------------------------------------------------------|----------------------------------------------------------------------------------------------------------------------------------------------------------------------------------------------------------------------------------------------------------------------------------------------------------------------------------------------------------------------------------------------------------------------------------------------------------------------------------------------------------------------------------------------------------------|
| <b>Pierwsze słowo</b>                                                                 | Wpisz pierwsze słowo, które powinno zostać dopasowane.                                                                                                                                                                                                                                                                                                                                                                                                                                                                                                         |
| <b>Typ zgodności</b>                                                                  | Wybierz właściwy typ dopasowania: <ul style="list-style-type: none"> <li>• <b>Samo</b> Powiadamia o wystąpieniu pierwszego słowa.</li> <li>• <b>Z kolejnym słowem</b> Powiadamia o wystąpieniu Pierwszego słowa, po którym natychmiastowo pojawia się podane Słowo opcjonalne.</li> <li>• <b>Bez kolejnego słowa</b> Powiadamia o pojawieniu się Pierwszego słowa, zaraz po którym <u>nie</u> pojawia się Słowo opcjonalne.</li> <li>• <b>W zdaniu z</b> Powiadamia o wystąpieniu Pierwszego słowa, jeśli w zdaniu występuje ze Słowem opcjonalnym.</li> </ul> |
| <b>Słowo opcjonalne</b>                                                               | Wpisz słowo, które będzie towarzyszyć Pierwszemu słowu. Przy podaniu Słowa opcjonalnego system sprawdza jedynie kombinację <b>Pierwsze słowo+Słowo opcjonalne</b> .                                                                                                                                                                                                                                                                                                                                                                                            |
| <b>Niepełne</b>                                                                       | Zaznacz to pole, aby powiadomić o wystąpieniu <u>części</u> Pierwszego słowa.                                                                                                                                                                                                                                                                                                                                                                                                                                                                                  |
| <i>Przyciski <b>Dodaj</b> i <b>Usuń</b> pozwalają dodawać i usuwać słowa z listy.</i> |                                                                                                                                                                                                                                                                                                                                                                                                                                                                                                                                                                |
| Reakcja na wystąpienie HotWords.                                                      | <b>Wyświetlaj pasujący tekst</b><br>Wyświetla tekst, który pasuje do słów HotWords.<br><b>Przywróć Odtwarzacz</b><br>Wyświetla okno TV.                                                                                                                                                                                                                                                                                                                                                                                                                        |
| <b>Nagrywanie</b>                                                                     | <b>Uaktywnij TV Magazine</b><br>Uaktywnia TV Magazine (patrz <i>TV Magazine</i> na stronie 28).<br><b>Uaktywnij cyfrowy odtwarzacz wideo</b><br>Włącza Magnetowid cyfrowy (patrz <i>Cyfrowy magnetowid</i> na stronie 39).                                                                                                                                                                                                                                                                                                                                     |

## TV Magazine

Funkcja TV Magazine pozwala na transkrypcję nadawanych tekstów kodowanych, łącznie z ich obrazem i tekstem. Pliki można nagrywać w formacie RTF (Rich Text Format), który zachowuje formatowanie i może być używany w wielu programach edycji tekstu, samego tekstu (TXT) lub kodów HTML dla stron internetowych. Za pomocą narzędzia Terminarz można uruchamiać TV Magazine w zaprogramowanych dniach i godzinach (patrz [Terminarz](#) na stronie 83).

### **Uwaga**

- Funkcja TV Magazine jest dostępna tylko w Ameryce Północnej.
- Kiedy funkcja TV Magazine jest włączona, dokonuje ona transkrypcji tekstu nawet przy wyłączonej funkcji wyświetlania napisów kodowanych.

### **Aby uruchomić TV Magazine**

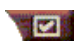

Naciśnij przycisk Ustawienia na panelu sterowania TV, wybierz kartę **Napisy kodowane**, a następnie naciśnij przycisk **Ustawienia TV Magazine**.

Aby włączyć TV Magazine, zaznacz pole **Włącz**. Przy pierwszym uruchomieniu tej funkcji wyświetlony zostanie Kreator ustawień TV Magazine.

|                                 |                                                                                                                                                                                                                                                                                                                                                                                                                                                                                                                                                                                                                                                                                                                                                                                                                            |
|---------------------------------|----------------------------------------------------------------------------------------------------------------------------------------------------------------------------------------------------------------------------------------------------------------------------------------------------------------------------------------------------------------------------------------------------------------------------------------------------------------------------------------------------------------------------------------------------------------------------------------------------------------------------------------------------------------------------------------------------------------------------------------------------------------------------------------------------------------------------|
| <b>Nazwa pliku</b>              | Wpisz nazwę pliku.                                                                                                                                                                                                                                                                                                                                                                                                                                                                                                                                                                                                                                                                                                                                                                                                         |
| <b>Format pliku</b>             | Wybierz format pliku (RTF, TXT lub HTML).                                                                                                                                                                                                                                                                                                                                                                                                                                                                                                                                                                                                                                                                                                                                                                                  |
| <b>Opcje</b>                    | <p><b>Zastąp pliki</b><br/>Zaznacz to pole, aby nadpisywać istniejące pliki. Wyczyść zaznaczenie, aby zachować istniejące pliki.</p> <p><b>Usuwanie reklam</b><br/>Automatycznie pomija reklamy przy wyświetlaniu lub transkrypcji tekstu napisów kodowanych. Narzędzie to działa najlepiej w przypadku programów, które do nagrywania napisów kodowanych wykorzystują raczej tekst przewijający się zamiast rdymków tekstowych". Na przykład: Programy z zaproszonymi gośćmi, wiadomości, sport, czy też telenowele.</p> <p>(W zależności od formatu napisów kodowanych może się czasami zdarzyć, że reklamy też zostaną nagrane -- nieznaczne dostosowanie tej funkcji pozwoli na uzyskanie optymalnych rezultatów.)</p> <p><b>Konwersja wielkości liter</b><br/>Konwertuje wszystkie znaki na duże lub małe litery.</p> |
| <b>Przerwij transkrypcję po</b> | Określa w minutach długość tekstu, który będzie transkrybowany.                                                                                                                                                                                                                                                                                                                                                                                                                                                                                                                                                                                                                                                                                                                                                            |
| <b>Wybór rozmieszczenia</b>     | <p><b>Brak obrazu</b><br/>Obrazy nie są zapisywane.</p> <p><b>Obrazy po lewej</b><br/>Obrazy umieszczane są z lewej strony, a tekst z prawej strony.</p> <p><b>Obrazy po prawej</b><br/>Obrazy umieszczane są po stronie prawej, a tekst po lewej.</p> <p><b>Obrazy naprzemienne</b><br/>Obrazy i tekst są rozmieszczane raz po stronie lewej, raz po stronie prawej.</p> <p><b>Obrazy czarno-białe</b><br/>Zapisuje jedynie obrazy czarno--białe, aby zaoszczędzić miejsca na dysku.</p> <p><b>Liczba obrazów na stronie</b><br/>1/stronę<br/>2/stronę<br/>4/stronę</p>                                                                                                                                                                                                                                                   |

## Drugorzędna ścieżka dźwiękowa (SAP)

Drugorzędna ścieżka dźwiękowa może być wykorzystywana na przykład do przesyłania tłumaczonego tekstu, czytanego tekstu dla osób niedowidzących, prognoz pogody lub informacji o wyświetlanym programie.

### Uwaga

- Nie wszystkie stacje telewizyjne nadają w stereo lub ze ścieżką SAP.
- Funkcja SAP nie jest dostępna w japońskiej wersji programu TV.

### Aby odgrywać Drugorzędną ścieżkę dźwiękową

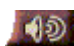

Kliknij prawym przyciskiem myszy przycisk Wyciszania na Panelu Sterowania Telewizji, a następnie z rozwijalnego menu wybierz pozycję **Sap**.

W menu tym możesz:

- włączyć napisy przy wyciszonym dźwięku,
- przełączyć się ze stereo na mono.

## Powiększanie i przesuwanie obrazu

Możliwe jest powiększenie obrazu wideo w panelu, by powiększyć wybrany jego fragment, po czym przywrócenie normalnej jego wielkości. Ponadto obraz w powiększonym fragmencie można przesuwać w pionie i w poziomie.

### Aby powiększyć obraz

Kliknij w obrębie panelu wideo, po czym, przytrzymując wciśnięty klawisz myszy, przeciągnij mysz, zakreślając prostokąt wokół obszaru do powiększenia.

Można też kliknąć prawym przyciskiem myszy przycisk 1:1, by wyświetlić menu zawierające różne poziomy powiększenia: Powiększenie x2, Powiększenie x4 lub Powiększenie x8.

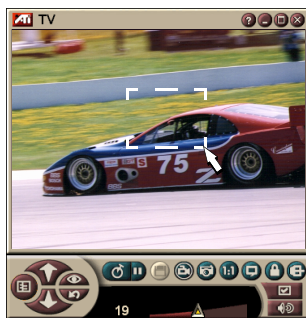

### Aby przesunąć obszar powiększony

Przemieszczaj mysz w obrębie obszaru powiększenia, przesuując obraz w pionie lub w poziomie.

### Aby przywrócić normalną wielkość obrazu

Kliknij prawym przyciskiem myszy w panelu wideo, by wyświetlić menu sterowania, wskaż pozycję **Powiększanie** ►, po czym wybierz **Zmniejsz powiększenie** lub

 Kliknij przycisk 1:1 w panelu sterowania.

## Pulpit obrazu wideo

### Aby zamienić tapetę pulpitu obrazem TV przy minimalizacji TV

 Naciśnij przycisk Ustawienia w Panelu sterowania Telewizji, wybierz kartę **Wyświetlanie**, a następnie zaznacz **Pulpit obrazu wideo**.

 Przy zmniejszeniu TV do ikony, tapeta pulpitu jest zamieniana obrazem TV.

 Ikona TV pojawia się na "pasku stanu" po prawej

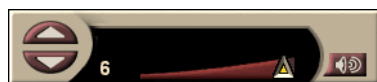

stronie paska zadań

Windows®. Kliknięcie ikony wyświetla mały panel sterowania, który pozwala na zmianę kanałów lub regulację głośności. Tekst napisów kodowanych nie jest wyświetlany.

Jeśli w systemie nie jest zainstalowany tuner TV, na panelu tym znajduje się suwak głośności oraz przyciski wyciszania.

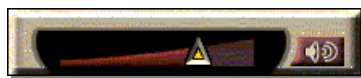

### Aby przywrócić tapetę pulpitu i obraz TV

Naciśnij przycisk **TV** (lub przycisk **Wideo**, jeśli w systemie zainstalowana jest karta z wejściem wideo) na pasku zadań Windows®.

## Blokada programu

Narzędzie blokady programu pozwala zablokować wybrane programy o określonej godzinie oraz ustawić hasło w celu ich odblokowania. Na stronie Blokady programu można określić kanał, termin oraz czas trwania blokady.

### Uwaga

- W hasłach **rozdzielana jest wielkość liter**. Na przykład, wyrazy ANETKA, Anetka oraz aneTka *nie* są tożsame.
- W przypadku zapomnienia hasła konieczne jest odinstalowanie i ponowne zainstalowanie odtwarzacza TV.

### Aby ustawić blokadę programu

- 1  Naciśnij przycisk Ustawienia na panelu sterowania TV, a następnie wybierz kartę **Tuner TV**.
- 2 Kliknij na żądanym programie, a następnie naciśnij przycisk **Szczegóły...**
- 3 Naciśnij przycisk **Blokada programu**, a następnie naciśnij przycisk **Szczegóły...**
- 4 Naciśnij przycisk **Twórz nowy**.

*Kreator blokady programu pomaga w procedurze blokowania.*

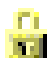

*Na liście programów z prawej strony kanałów zablokowanych obok nazwy programu pojawia się kłódka.*

### Aby usunąć blokadę programu

- 1  Naciśnij przycisk Ustawienia na panelu sterowania TV, a następnie wybierz kartę **Tuner TV**.
- 2 Kliknij program, który chcesz odblokować, a następnie naciśnij przycisk **Szczegóły...**
- 3 Naciśnij przycisk **Blokada programu**, a następnie naciśnij przycisk **Szczegóły...**
- 4 Wybierz program, który chcesz odblokować.
- 5 Naciśnij przycisk **Usuń**. Aby usunąć wszystkie blokady programów, naciśnij przycisk **Usuń wszystkie**.
- 6 Naciśnij przycisk **OK**.



## Zabezpieczenie przed dziećmi

Funkcja ochrony przed dziećmi pozwala na ograniczenie dostępu do programów TV w zależności od ich przeznaczenia dla poszczególnych grup wiekowych. Obraz wideo i dźwięk programów zabronionych będzie zakłócony do momentu wprowadzenia odpowiedniego hasła.

### Uwaga

- Funkcja zabezpieczenia przed dziećmi dostępna jest jedynie w północnoamerykańskim standardzie nadawania (NTSC).
- W hasłach **rozdzielane są wielkie i małe litery**, a długość hasła musi wynosić przynajmniej **trzy znaki**.
- W przypadku zapomnienia hasła konieczne jest odinstalowanie i ponowne zainstalowanie odtwarzacza TV.
- Funkcja zabezpieczenia przed dziećmi dostępna jest jedynie dla systemów komputerowych wyposażonych w tuner telewizyjny.
- Funkcja przechwytywania klatek nie jest dostępna dla programów zabezpieczonych, a funkcja rejestrowania wideo nagrywa obraz z zakłóceniami.

### Sposób użycia Zabezpieczenia przed dziećmi

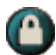

W celu wyświetlenia menu wyboru kliknij przycisk Zabezpieczenia przed dziećmi na Panelu Sterowania TV. Wybrany poziom zostanie zaznaczony.

**1** Kliknij właściwy poziom.

*Zostanie wyświetlone okno dialogowe Ustawianie hasła.*

**2** W górnym polu należy wpisać hasło, i potwierdzić je w polu dolnym.

Poniższa tabela przedstawia zalecenia amerykańskiej komisji FCC w stosunku do Zabezpieczenia przed dziećmi.

| Programy wyłącznie dla dzieci        |                                                    |
|--------------------------------------|----------------------------------------------------|
| TV-Y                                 | Program właściwy dla wszystkich dzieci.            |
| TV-Y7                                | Program przeznaczony dla dzieci od lat 7 i więcej. |
| Programy przeznaczone dla wszystkich |                                                    |
| TV-G                                 | Brak ograniczeń wiekowych.                         |
| TV-PG                                | Zalecany nadzór rodziców.                          |
| TV-14                                | Nadzór rodziców bardzo wskazany.                   |
| TV-MA                                | Tylko dla dorosłych.                               |

## Przechwytywanie obrazu wideo oraz obrazów statycznych

### Pełnoklatkowy obraz wideo.

Cyfrowy magnetowid pozwala na przechwycenie strumienia pełnoklatkowego obrazu i dźwięku ze źródła wideo i zapisanie go jako plik MPEG lub AVI na dysku komputera. Patrz [Cyfrowy magnetowid](#) na stronie 39.

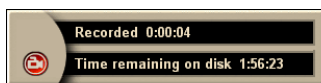

**Obrazy statyczne.** Z obrazu telewizora oraz klipów MPEG pełnokolorowe (24 bitów na piksel) obrazy statyczne (patrz [Video CD](#) na stronie 61), można

przechwytywać, zapisywać i drukować. Obrazy te są umieszczane w Galerii obrazów statycznych, która zapisuje je jako standardowe mapy bitowe Windows (.bmp) i w wielu innych formatach.

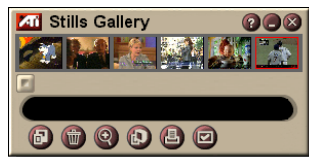

Galeria obrazów statycznych jest także zgodna z większością standardowych formatów graficznych, dzięki czemu obrazy można umieszczać w raportach, prezentacjach, listach oraz innych dokumentach, lub uatrakcyjnić nimi szkolenia i prezentacje. Więcej informacji podano w rozdziale [Galeria obrazów statycznych](#) na stronie 55.

### **Uwaga**

Jeśli program jest zabezpieczony przed dziećmi, nie można przechwytywać klatek (patrz [Zabezpieczenie przed dziećmi](#) na stronie 33).

## Nagrywanie klipu z obrazem i dźwiękiem z odtwarzacza TV

### Aby nagrać klip z obrazem i dźwiękiem

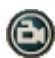

Kliknij przycisk Nagrywanie na panelu sterowania Telewizji.

*Magnetowid cyfrowy rozpocznie zapisywanie obrazu i dźwięku do pliku MPEG lub AVI na dysku twardym komputera. Informacje na temat określonych formatów zapisu wideo zawiera rozdział [Ustawienia Magnetowidu cyfrowego](#) na stronie 40.*

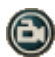

Aby zakończyć nagrywanie, kliknij przycisk Nagrywanie na magnetowidzie cyfrowym. Zostanie wyświetlone okno Zapisz jako, w którym można nadać nazwę i zapisać przechwyconą sekwencję.

**Uwaga**

Jeśli program jest zabezpieczony przed dziećmi, to materiał nagrywany będzie też nieczytelny (patrz [Zabezpieczenie przed dziećmi](#) na stronie 33.)

### Aby przechwytywać klatki z TV

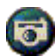

Kliknij przycisk aparatu fotograficznego w panelu sterowania TV. Aktualnie wyświetlana klatka zostanie umieszczona w galerii obrazów statycznych (patrz [Galeria obrazów statycznych](#) na stronie 55).

**Uwaga**

Jeśli program jest zabezpieczony przed dziećmi, funkcja przechwytywania klatek nie będzie dostępna (patrz [Zabezpieczenie przed dziećmi](#) na stronie 33.)

## TV-on-Demand™

Funkcja TV-on-Demand (“przesunięcia w czasie”) jest dostępna pod warunkiem, że obsługuje ją karta graficzna (na przykład, karty ALL-IN-WONDER RADEON lub ALL-IN-WONDER 128 PRO). Funkcja ta łączy w sobie spontaniczność żywego programu TV z możliwościami zapisu i powtarzania scen oferowanymi przez magnetowid, stwarzając nowy sposób oglądania i interakcji z TV.

**Paauza na żywo.** Kliknięciem myszy możesz wstrzymać nadawany na żywo program TV oraz wznowić oglądanie przesuniętego w czasie obrazu wideo później, nie tracąc ani minuty transmisji.

**Natychmiastowe powtarzanie.** Jeżeli zachodzi potrzeba powtórzenia pewnej sceny, program można cofnąć, zobaczyć jeszcze raz wybraną scenę, po czym powrócić do oglądania programu. Można zmieniać szybkość odtwarzania lub przejść do przodu o wybraną liczbę sekund. Ponadto przesunięty w czasie materiał wideo można wyeksportować do pliku MPEG (.MP2).

### Uwaga

- Ponieważ TV-on-Demand nagrywa obraz na dysk twardy, nie jest możliwe korzystanie w tym trybie z cyfrowego magnetowidu (patrz [Cyfrowy magnetowid](#) na stronie 39).
- Nie można przesunąć w czasie zabezpieczonych przed kopiowaniem źródeł sygnału wideo

### Aby oglądać program przesunięty w czasie

 Kliknij przycisk TV-on-Demand lub przycisk pauzy  na panelu sterowania TV.

- Po kliknięciu przycisku Wstrzymaj, panel sterowania TV zmienia się w panel sterowania TV-On-Demand, wyświetlana jest ostatnia klatka wideo, a TV-On-Demand przechwytytuje na żywo obraz wideo.

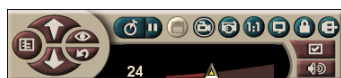

Tryb żywej telewizji

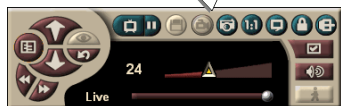

Tryb TV-on-Demand

Panel TV zmienia się w panel TV-on-Demand, a na wyświetlaczu jest przedstawiany nagrany materiał wideo.

- Po kliknięciu przycisku odtwarzania  wyświetlany jest przesunięty w czasie materiał wideo, podjęty w momencie zastopowania programu TV.

**Uwaga**

Jeśli nie jest słyszalny dźwięk, patrz [Rozwiązywanie problemów](#) na stronie 87.

**Aby powrócić do bieżącego programu TV**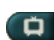

Kliknij przycisk nadawanego na bieżąco programu TV na panelu sterowania TV-on-Demand. Nagrywanie wideo zostaje wstrzymane. Aby kontynuować nagrywanie w trakcie oglądania telewizji, pozostań w trybie TV-on-Demand i przeciągnij suwak na prawo (patrz [Aby przemieszczać się w obrębie przesuniętego w czasie wideo](#) na stronie 38).

**Aby odtworzyć wideo przesunięte w czasie**

Kliknij przycisk odtwarzania  na panelu sterowania TV-on-Demand.

**Aby zatrzymać wideo przesunięte w czasie**

Przycisk pauzy  jest dostępny zarówno w trakcie oglądania zwykłej telewizji, jak i przy oglądaniu wideo TV-on-Demand. Po jego kliknięciu odtwarzanie zostaje wstrzymane i wyświetlana jest ostatnia klatka. Przycisk pauzy zamienia się w przycisk odtwarzania .

Po kliknięciu przycisku odtwarzania wznawiane jest odtwarzanie wideo przesuniętego w czasie, a w miejscu przycisku odtwarzania pojawia się przycisk pauzy.

**Aby zmienić szybkość odtwarzania wideo przesuniętego w czasie**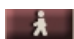

Kliknij przycisk szybkości, by wybrać tempo odtwarzania: Wolne odtwarzanie (połowa prędkości), Odtwarzanie normalne i Szybkie odtwarzanie (prędkość 1,5x). Kliknięcie tego przycisku prawym przyciskiem myszy powoduje wyświetlenie menu z wyborem opcji.

- Przycisk szybkości odtwarzania jest dostępny tylko w trybie TV-on-Demand, za przyciskiem telewizji na żywo.

**Aby przemieszczać się do przodu i do tyłu w obrębie wideo przesuniętego w czasie**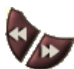

Kliknij lewy przycisk, by przejść do tyłu; kliknij prawy przycisk, by przejść do przodu. Domyślne ustawienia są następujące:

- przewijanie do przodu: 10 sekund,
- przewijanie do tyłu: 30 sekund

Można kliknąć przycisk prawym przyciskiem myszy, by zmienić te ustawienia na 10 sekund, 30 sekund, 1 minutę lub dwie minuty.

### Aby przemieszczać się w obrębie przesuniętego w czasie wideo

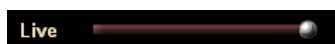

żywo

Przeciągnij suwak za pomocą myszy. Wyświetlacz czasu informuje o aktualnej pozycji

w obrębie nagranych materiału. Po przesunięciu suwaka do prawego końca skali wyświetlacz czasu zastąpiony zostaje informacją o wyświetlaniu obrazu TV na **żywo**.

### Aby wyeksportować materiał wideo przesunięty w czasie

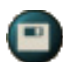

Kliknij przycisk eksportu na panelu sterowania TV-on-Demand. Wyświetlane jest okno dialogowe, pozwalające wybrać fragment wideo do zapisania (Zakres:), a także lokalizację pliku (Plik wyjściowy:). Materiał wideo zapisywany jest w formacie MP2.

Eksport następuje szybciej po uprzednim powrocie do trybu odbioru na żywo (nie należy jednak powracać do funkcji TV-on-Demand, ponieważ nagrany wcześniej materiał zostanie zastąpiony nowym).

## Cyfrowy magnetowid

Magnetowid cyfrowy charakteryzuje się prostotą obsługi i rozbudowanymi

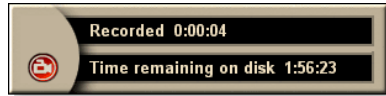

możliwościami przechwytywania wideo. Po przechwyceniu materiału wideo lub dźwiękowego z wybranego źródła materiał ten można zapisać w pliku MPEG lub AVI. Pliki wideo i audio można wyświetlać za pomocą programu File Player (patrz [File Player](#) na stronie 78). Funkcja Terminarza pozwala nagrywać programy TV we wskazanym dniu i o wskazanej godzinie (patrz [Terminarz](#) na stronie 83).

### Uwaga

Ponieważ funkcja TV-on-Demand wykorzystuje do nagrywania dysk twardy, nie jest możliwe korzystanie z magnetowidu cyfrowego w trybie TV-on-Demand (patrz [TV-on-Demand™](#) na stronie 36). Zamiast magnetowidu w trybie TV-on-Demand można użyć funkcji eksportu (patrz [Aby wyeksportować materiał wideo przesunięty w czasie](#) na stronie 38).

### Aby uruchomić magnetowid cyfrowy

Przy przechwytywaniu obrazu z TV (patrz [Aby nagrać klip z obrazem i dźwiękiem](#) na stronie 35) Magnetowid cyfrowy otwierany jest automatycznie. Jeżeli wymagane jest wyświetlenie komunikatu ostrzegawczego przed rozpoczęciem nagrywania, włącz opcję **Wyświetlaj komunikat przed nagrywaniem** na karcie **Magnetowid cyfrowy** w oknie **Ustawienia odtwarzacza TV** (patrz [Ustawienia Magnetowidu cyfrowego](#) na stronie 40).

## Kompresja i zapisywanie przechwyconego obrazu wideo

Na stronie Ustawienia użytkownika Magnetowidu cyfrowego... można skompresować plik z przechwyconym obrazem wideo i zapisać go w popularnych formatach (patrz [Jakość nagrywania w rozdziale Ustawienia Magnetowidu cyfrowego](#) na stronie 40). Jakość przechwyconego obrazu wideo zależy od następujących warunków:

- szybkości komputera (procesor)
- rozmiaru dostępnej pamięci (RAM)
- szybkości dysku twardego
- rozmiaru okna Przechwytywania obrazu wideo
- używanego systemu codec (kodowania-dekodowania).

## Ustawienia Magnetowidu cyfrowego

Na stronach ustawień Magnetowidu cyfrowego można określić jakość nagrywania, czas trwania, ogólne opcje oraz ustawienia użytkownika.

### Ustawianie Magnetowidu cyfrowego

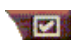

Naciśnij przycisk Ustawienia na panelu sterowania TV, a następnie wybierz kartę **Magnetowid cyfrowy**.

|                                                        |                                                                                                                                                                                                                                                                                                                                                                                                                                                                                                                                                                                                                                                                                                                                                                                                                                                                                           |
|--------------------------------------------------------|-------------------------------------------------------------------------------------------------------------------------------------------------------------------------------------------------------------------------------------------------------------------------------------------------------------------------------------------------------------------------------------------------------------------------------------------------------------------------------------------------------------------------------------------------------------------------------------------------------------------------------------------------------------------------------------------------------------------------------------------------------------------------------------------------------------------------------------------------------------------------------------------|
| <p><b>Jakość nagrywania</b></p>                        | <p>Zaznacz opcję <b>Jakość najlepsza</b>, <b>Jakość dobra</b>, <b>Video CD</b> (patrz <i>Wskazówka</i>), lub <b>Najdłuższy czas</b>. Im wyższa jakość, tym krótszy odcinek wideo będzie można zapisać na dysku. Aby osiągnąć jeszcze wyższy poziom kontroli, naciśnij przycisk <b>Ustawienia użytkownika</b> by wyświetlić kartę <b>Ustawienia użytkownika</b>, gdzie można tworzyć i modyfikować gotowe formaty przechwytywania.</p> <p>Kliknij przycisk <b>Twórz nowy...</b>, by utworzyć nowy format przechwytywania. Procedurę ułatwia Kreator przechwytywania.</p> <p>Kliknij przycisk <b>Edytuj...</b>, by zmodyfikować istniejący format przechwytywania.</p> <ul style="list-style-type: none"> <li>• Krok 2 w Kreatorze przechwytywania zawiera opcję <b>usuwania przeplotu</b>. Należy ją zaznaczyć, by uniknąć powstawania pasów poziomych w przechwyconym obrazie.</li> </ul> |
|                                                        | <p><b>Wskazówka:</b> Ustawienie <b>Video CD</b> pozwala na tworzenie plików zgodnych z Video CD, które można odtwarzać na większości domowych odtwarzaczy DVD. Aby stworzyć płytę CD zawierającą pliki Video CD, potrzebna jest nagrywalna płyta CD oraz odpowiednie oprogramowanie do tworzenia płyt CD.</p>                                                                                                                                                                                                                                                                                                                                                                                                                                                                                                                                                                             |
| <p><b>Ustawienia miejsca na dysku</b></p>              | <p>Pozwala przydzielić miejsce na dysku na plik z przechwyconym wideo.</p> <p><b>Nagraj na dysk</b><br/>Wybierz dysk, na którym obraz zostanie zapisany.</p> <p><b>Rozmiar miejsca na dysku, które należy pozostawić</b><br/>Za pomocą suwaka określ ilość miejsca, które na dysku powinno pozostać wolne. Opcja ta pozwala zapobiec całkowitemu wypełnieniu dysku przez nagrany materiał.</p>                                                                                                                                                                                                                                                                                                                                                                                                                                                                                            |
| <p><b>Bieżące ustawienia</b></p>                       | <p>Wyświetla format, rozmiar, częstotliwość klatek oraz format dźwięku nagrywanego materiału.</p>                                                                                                                                                                                                                                                                                                                                                                                                                                                                                                                                                                                                                                                                                                                                                                                         |
| <p><b>Przechwytyj klatki o rozmiarze 640 x 480</b></p> | <p>Przechwytuje klatki o rozmiarze 640 x 480 pikseli.</p>                                                                                                                                                                                                                                                                                                                                                                                                                                                                                                                                                                                                                                                                                                                                                                                                                                 |



|                                               |                                                                                                   |
|-----------------------------------------------|---------------------------------------------------------------------------------------------------|
| <b>Wyświetlaj komunikat przed nagrywaniem</b> | Po skonfigurowaniu parametrów wyświetlane zostaje okno informujące o rozpoczęciu przechwytywania. |
| <b>Nagrywaj przez</b>                         | Zaznacz to pole, po czym wpisz liczbę godzin i minut do nagrania.                                 |

## Kodowanie MPEG na bieżąco

Jeżeli komputer jest wyposażony w procesor Pentium® II, Pentium® III, Pentium MMX lub AMD Athlon™, konfiguracja taka umożliwi przechwytywanie obrazu wideo i zapisywanie go w formacie MPEG na bieżąco.

Okno Ustawienia użytkownika Magnetowidu cyfrowego zawiera cztery gotowe komplety ustawień dla formatów MPEG, jak i AVI, które można dopasować.

### Aby dobrać ustawienia nagrywania MPEG

#### **Uwaga**

Przed przystąpieniem do zmiany tych ustawień należy dobrze poznać format MPEG. Najlepiej poeksperymentować -- jeśli wyniki okazują się niezgodne z oczekiwaniami, wystarczy kliknąć przycisk **Anuluj**, by przywrócić wartości domyślne.

- 1  Naciśnij przycisk Ustawienia na panelu sterowania TV, a następnie wybierz kartę **Magnetowid cyfrowy**.
- 2 Kliknij przycisk **Ustawienia użytkownika...**  
*Wyświetlone zostanie okno Ustawienia użytkownika.*
- 3 Wybierz odpowiedni format MPEG.
  - Aby zmienić wartości domyślne, kliknij przycisk **Edytuj...** Wyświetlony zostanie Kreator przechwytywania, który pomoże w dobraniu właściwych parametrów.
  - Aby utworzyć nowy format przechwytywania, kliknij przycisk **Twórz nowy...** Kreator przechwytywania pomoże w dobraniu parametrów nowego formatu.

## Osiąganie optymalnych wyników przy nagrywaniu wideo MPEG

### Aby wyświetlić okno właściwości MPEG

- 1  Naciśnij przycisk Ustawienia na panelu sterowania TV, a następnie wybierz kartę **Magnetowid cyfrowy**.
- 2 W polu **Jakość nagrywania** kliknij przycisk **Ustawienia użytkownika...**
- 3 Kliknij pozycję **Jakość najlepsza**, po czym kliknij przycisk **Edytuj...**  
*Wyświetlone zostanie okno Kreatora przechwytywania (krok 1).*
- 4 Wpisz nazwę i ewentualny opis zestawu parametrów .
- 5 Kliknij przycisk **Dalej >**.  
*Wyświetlone zostanie okno Kreatora przechwytywania (krok 2).*
- 6 Wybierz opcję MPEG-1 lub MPEG-2, po czym kliknij przycisk **Dalej >**.  
*Wyświetlone zostanie okno Kreatora przechwytywania (krok 3).*

### Aby wybrać przechwytywanie tylko ramek I w materiale MPEG

Ta metoda jest mniej obciążająca dla procesora, lecz wymaga 2- do 3-krotnego zwiększenia ilości zapisywanych danych.

- 1 Kliknij przycisk **Tylko ramki I**.
- 2 Kliknij przycisk **Dalej>**, po czym przycisk **Zakończ**.

### Aby wybrać przechwytywanie ramek I, B, P w materiale MPEG

Ta metoda w większym stopniu obciąża procesor, lecz wydatnie zmniejsza objętość pliku wymaganą do zapisania materiału wideo o dobrej jakości.

- 1 W Kreatorze przechwytywania (krok 3) w polu **Liczba ramek P w grupie** wpisz wartość **4**.
- 2 W polu **Liczba ramek B w podgrupie** wpisz wartość **2**.  
(Wartości powyższe są wpisywane automatycznie po kliknięciu przycisku **Domyślnie**).

Aby osiągnąć pełną wydajność 29,97 klatek/sekundę w formacie MPEG-1 lub MPEG-2, zalecane są następujące ustawienia. Podano przykładowe szybkości procesora i przepustowość w megabitach na sekundę (Mbps), należy jednak zauważyć, że niektóre rodzaje materiału wideo łatwiej poddają się kompresji niż inne, zależnie od ilości szybkiego ruchu oraz liczby skomplikowanych scen.

| Format wideo | Ramki IBP (Mbps) | Minimalna szybkość procesora | Tylko ramki I (Mbps) | Minimalna szybkość procesora |
|--------------|------------------|------------------------------|----------------------|------------------------------|
| 160x120      | 1,0              | P200-MMX                     | 1,0                  | P200-MMX                     |
| 352x240      | 1,5              | PII-266                      | 2,0                  | P200-MMX                     |
| 320x480      | 3,0              | PII-400                      | 4,0                  | PII-266                      |
| 640x480      | 4,0              | Athlon 600                   | 6,0                  | PIII-450                     |
| 720x480      | 4,0              | Athlon 700                   | 6,0                  | PIII-450                     |

**Mbps** = megabity na sekundę, czyli miliony bitów na sekundę.  
 1 Mbps odpowiada w przybliżeniu 125Kbajtów/sekundę.

- Suwak szacowania ruchu pozwala sterować jakością wideo i ustawienie wysokiej wartości (75 lub więcej) w większym stopniu obciąża procesor, lecz zapewnia obraz o wyższej jakości. Wartość niska (25 lub mniej) przyspiesza kodowanie, lecz przy danej przepustowości bitowej daje niższą jakość obrazu.
- Przedstawione w tabeli wartości szybkości w Mbps podano przy założeniu współczynnika ruchu równego 10.
- Jeśli dany komputer nie jest w stanie zapewnić płynnego obrazu wideo przy szybkości 29,97 klatek na sekundę, spróbuj poniższych rozwiązań:
  - Przechwytywać tylko ramki I.
  - Przechwytywać przy mniejszym rozmiarze klatki.
  - Przechwytywać tylko obraz bez dźwięku.

Dekodery MPEG-1 znajdują się w powszechnym użytku, więc materiał zapisany w formacie MPEG-1 da się odtworzyć na wielu komputerach. Jednak odtwarzanie wideo MPEG-1 na komputerach PC odbywa się zwykle przy użyciu dekodera firmy Microsoft, który może nie zapewniać najwyższej wydajności.

Odtwarzanie wideo w formacie MPEG-2 na komputerze PC wymaga obecności dekodera MPEG-2. W przypadku kart graficznych ATI dekodery MPEG-2 korzystają ze sprzętowych mechanizmów IDCT i kompensacji ruchu, co zapewnia wyższą jakość odtwarzanego materiału przy mniejszym obciążeniu procesora głównego niż w przypadku dekodera MPEG-1 firmy Microsoft.

## TV Listings

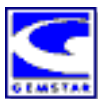

Stworzony przez firmę Gemstar program GUIDE Plus+™ jest elektronicznym narzędziem obsługi programu telewizyjnego dla Microsoft Windows. Dostarcza on szczegółowych informacji o programach, takich jak nazwy i numery stacji, nazwy programu i dodatkowe szczegóły.

Przed pierwszym użyciem programu TV Listings zalecane jest uruchomienie Kreatora inicjalizacji TV (patrz *Konfigurowanie odtwarzacza TV* na stronie 13).

Program umożliwia programowanie nagrywania i oglądania programów, wyszukiwanie programów oraz prowadzenie listy ulubionych programów. Więcej informacji zawiera pomoc ekranowa programu TV Listings.

### Uwaga

- Funkcja TV Listings jest dostępna tylko w Ameryce Północnej.
- Do kopiowania programów TV Listings na komputer lokalny wymagane jest połączenie z Internetem.

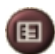

### Aby uruchomić TV Listings

Kliknij przycisk TV Listings na panelu sterowania TV lub przycisk **TV Listings** na pasku LaunchPad.

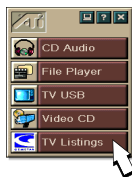

### Aby skorzystać z informacji TV Listings z programu TV

- W trakcie automatycznego wyszukiwania kanałów funkcja TV Listings podaje nazwy stacji (patrz punkt *Automatyczne wyszukiwanie* w rozdziale *Ustawienia tunera TV* na stronie 18.)
- Przy zmianie kanałów wyświetlane są aktualna nazwa programu, nazwa stacji oraz jej numer.
- Podczas oglądania TV kliknij prawym przyciskiem myszy przycisk TV Listings, aby wyświetlić następujące opcje:

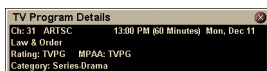

### •Szczegóły programu TV

Jeśli TV Listings posiada informacje o danym

programie, wyświetla panel ze szczegółową informacją.

- **Automatyczna aktualizacja** W miarę upływu czasu lub przy zmianie kanałów, aktualizowany jest panel ze Szczegółami programu TV.
- **Kopiuj** Zaznacz tę opcję, aby kopiować dane z panelu Szczegóły programu TV do Schowka Windows.

- Kliknięcie prawym przyciskiem myszy w polu tekstowym panelu Szczegóły programu TV także udostępnia opcje **Automatyczna aktualizacja** oraz **kopiuj** do Schowka.

**Uwaga**

Przy korzystaniu z funkcji TV Listings panel sterowania TV jest ukryty, a poniższe funkcje są niedostępne:

- wyświetlanie informacji o kanale na tle obrazu,
- zmiana rozmiaru panelu wyświetlania (na [stronie 14](#)),
- powiększanie i przemieszczanie obrazu w powiększonym oknie (na [stronie 30](#)),
- pulpit Video jest wyłączany po otwarciu TV Listings i ponownie włączany po zamknięciu tego programu (na [stronie 31](#)),

Funkcja TV Listings jest niedostępna przy korzystaniu z poniższych funkcji:

- przeskakiwanie po kanałach (na [stronie 23](#)),
- przechwytywanie materiału wideo (na [stronie 34](#)).

## Konfiguracja TV Listings

### Rejestracja

Przy pierwszym uruchomieniu systemu GUIDE Plus+ należy się zarejestrować. Pozwala to na załadowanie list dla danego obszaru lub operatora telewizji kablowej.

### Aby załadować aktualną listę

**1** Z menu **File** wybierz **Download Weekly File ...**

*Wyświetlone zostanie okno Download Assistant.*

**2** Kliknij przycisk **Download**, aby załadować listy.

Aby zmodyfikować ustawienia, kliknij przycisk **Change Settings**.

### Dostosowywanie kanałów

W menu **Edit** znajdują się dwie funkcje związane z listą kanałów:

- **Station Lists ...** pozwala na tworzenie i zarządzanie listą stacji, opartą na podstawowej liście dla danego obszaru czy operatora telewizji kablowej.
- **Channel Number ...** pozwala na przypisywanie i zarządzanie numerami kanałów dla każdej stacji.

## Nawigacja

Aby przełączać się między trybami wyświetlania TV Listings, kliknij zakładkę z danym widokiem lub wybierz go z menu **View** na górze ekranu.

W obrębie danego widoku przemieszczaj się używając myszy lub klawiszy kursora. Kliknij lewym przyciskiem myszy, aby wybrać daną pozycję i wyświetlić jej szczegóły w oknie danych powyżej siatki lub spisu.

Kliknij prawym przyciskiem myszy, aby wyświetlić menu podręczne z wieloma opcjami:

|                        |                                                                                                                                     |
|------------------------|-------------------------------------------------------------------------------------------------------------------------------------|
| <b>Watch</b>           | Dodaje pozycję do terminarza <b>Watch</b> (patrz <a href="#">Zakładka Schedules</a> na stronie 51).                                 |
| <b>Record</b>          | Dodaje pozycję do terminarza <b>Record</b> (patrz <a href="#">Zakładka Schedules</a> na stronie 51).                                |
| <b>Favorite</b>        | Dodaje pozycję do terminarza <b>Favorite</b> (patrz <a href="#">Favorite Search</a> na stronie 49).                                 |
| <b>Program Details</b> | Wyświetla okno ze szczegółowym opisem programu oraz dodatkowymi porami jego emisji.                                                 |
| <b>Go To</b>           | Dostraja okno PIP (obrazu w obrazie Ń pojawiające się w górnym lewym rogu przewodnika, gdzie wyświetlany obraz TV) do danej stacji. |

## Nagrywanie

TV Listings pozwala na automatyczne nagrywanie programów przez tuner TV. Po wyborze programu do nagrywania wyświetlane jest podręczne okno, gdzie należy podać nazwę i lokalizację pliku z nagraniem.

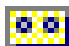

Po wyborze programu, który ma być nagrany, pojawia się ikona Record obok tytułu programu (w każdym trybie wyświetlania listy programów).

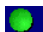

**Record**

- Aby usunąć program z Record Schedule, wystarczy kliknąć ikonę Record obok tytułu programu.

## Wyświetlanie

TV Listings pozwala na automatyczne wyświetlanie programów przez tuner TV. Po wyborze programu, który ma być wyświetlony, pojawia się ikona Watch obok tytułu programu (w każdym trybie wyświetlania listy programów).

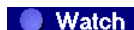

- Aby usunąć program z Watch Schedule, wystarczy kliknąć ikonę Watch obok tytułu programu.

## Widoki

Przewodnik można wyświetlać na dwa podstawowe sposoby: **Grid** i **Log**.

**Widok Grid** wyświetla całodobową listę programów w tabeli (podobną do spisu programów w gazecie czy gazetce z programami kablowymi). Klawiszami strzałek można przewijać w górę, w dół, w lewo i w prawo. Można także ją przewijać suwakami w pionie i w poziomie.

- Przewinięcie listy do danego programu spowoduje wyświetlenie szczegółowej informacji o nim ponad siatką.
- Aby wyświetlać jedynie wybrane stacje, użyj opcji **Station Lists ...** z menu **Edit** (patrz *Dostosowywanie kanałów* na stronie 45.)

**Widok Log** wyświetla listę informacji w następującym porządku: Date/Station/Category oraz Title/Episode. Klawiszami strzałek można przewijać w górę, w dół, w lewo i w prawo. Można także ją przewijać suwakami w pionie i w poziomie.

- Przewinięcie listy do danego programu spowoduje wyświetlenie szczegółowej informacji o nim ponad spisem programów.
- Aby wyświetlać jedynie wybrane stacje, użyj opcji **Station Lists ...** z menu **Edit** (patrz *Dostosowywanie kanałów* na stronie 45.)

## Opcje Filter

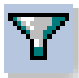

Kliknij ikonę Filter, aby wyświetlić okno dialogowe Opcje Filter, w którym można dostosować bieżący tryb wyświetlania i szybko wyszukiwać programy. Wybierz pola, które chcesz zastosować do bieżącego widoku i kliknij **Close**.

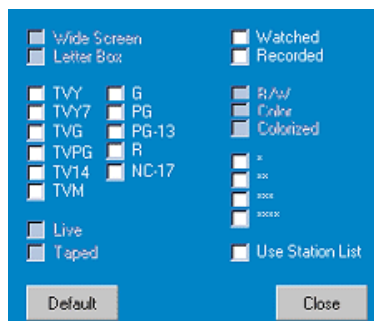

Zaznacz pole wyboru **Use Station List**, aby zastosować najaktualniejszą listę stacji.

## Zakładka Actors

Zakładka Actors wyświetla wszystkich aktorów występujących w filmach w bieżącej liście. Po lewej stronie ekranu wyświetlana jest lista nazwisk i imion aktorów. Kliknij nazwisko aktora, aby wyświetlić powiązane z nim filmy i pory wyświetlania.

- Użyj klawiszy strzałek do przewijania w górę i w dół listy Actors.
- W polu tekstowym powyżej listy Actors możesz także wpisać część lub całe nazwisko aktora, aby szybko go znaleźć.
- Przewinięcie listy do danego programu spowoduje wyświetlenie szczegółowej informacji o nim ponad listą.
- Aby wyświetlać jedynie wybrane stacje, użyj opcji **Station Lists ...** z menu **Edit** (patrz *Dostosowywanie kanałów* na stronie 45).



## Zakładka Categories

Zakładka Categories wyświetla wszystkie kategorie programów w bieżących listach. Po lewej stronie ekranu jest wyświetlana lista kategorii.

- Kliknij kategorię, którą chcesz oglądać, aby wyświetlić wszystkie tytuły dla tej kategorii po prawej stronie ekranu.
- Podwójne kliknięcie kategorii ze znakiem + wyświetli z prawej strony ekranu listę podkategorii.
- Użyj klawiszy strzałek do przewijania w górę i w dół listy Category. Można także ją przewijać suwakami w pionie i w poziomie.
- Przewinięcie listy do danego programu spowoduje wyświetlenie szczegółowej informacji o nim ponad spisem programów.
- Aby wyświetlać jedynie wybrane stacje, użyj opcji **Station Lists ...** z menu **Edit** (patrz *Dostosowywanie kanałów* na stronie 45).

## Searches

GUIDE Plus+ wyposażony jest w zaawansowaną wyszukiwarę pomagającą w odnalezieniu danych programów. Można zapisywać i zarządzać własną listą cotygodniowego wyszukiwania, oraz listą Favorite Searches, która śledzi preferowane programy i filmy.

## Favorite Search

Do Favorite Search przechodzi się przez zakładkę **Searches**. Favorites to specjalna lista tytułów programów, które można zachowywać, aby je później wyszukiwać jednym kliknięciem myszą. W każdym trybie widoku przewodnika można dodawać i usuwać pozycje z listy Ulubionych.

- Programy Favorites są zawsze pierwszym rezultatem wyszukiwania wyświetlanym w zakładce Searches. Są one podobne do innych wyszukiwań, lecz nie można ich usunąć.
- Jeśli jeden z ulubionych programów widnieje w jednym z widoków przewodnika, przed tytułem programu pojawi się symbol 😊.

Zwykle listy ulubionych używa się do wyszukiwania ulubionych programów przy aktualizacji pliku danych. Z listy szukania wybierz Favorite Searches a przewodnik wyszuka i wyświetli wszystkie ulubione pozycje. Następnie dowolne z nich można wprowadzić do Schedule. Favorite programy można wybierać na dwa sposoby:

- W danym widoku wybierz zdarzenie, które chcesz umieścić na liście Favorite. Kliknij prawym przyciskiem myszy, aby wyświetlić menu **Event**, następnie wybierz opcję **Favorite**, aby przełączyć umieszczenie pozycji na liście Favorite.
- W każdej liście zdarzeń przed danym zdarzeniem wyświetlane są trzy pola wyboru. Prawe pole wyboru jest znacznikiem Favorite; kliknij to pole by przełączyć jego zaznaczenie.

## Zakładka Movies

Zakładka Movies wyświetla po lewej stronie ekranu wszystkie podkategorie filmów dla wszystkich filmów w bieżących listach.

- Kliknij kategorię, którą chcesz oglądać, aby wyświetlić wszystkie tytuły dla tej kategorii po prawej stronie ekranu.
- Użyj klawiszy strzałek do przewijania w górę i w dół listy Movie. Można także ją przewijać suwakami w pionie i w poziomie.
- Przewinięcie listy do danego programu spowoduje wyświetlenie szczegółowej informacji o nim ponad spisem programów.
- Aby wyświetlać jedynie wybrane stacje, użyj opcji **Station Lists ...** z menu **Edit** (patrz *Dostosowywanie kanałów* na stronie 45).

## Zakładka Schedules

Terminarz to lista zdarzeń telewizyjnych, które zostały wybrane w danym widoku (w tym w widoku rezultatów wyszukiwania). Terminarz jest przedstawiany w postaci widoku Log (patrz opis na [stronie 47](#)). Można tu wybrać spośród trzech list:

- **Watch** wyświetla wszystkie zdarzenia z ustawionym przynajmniej znacznikiem Watch.
- **Record** wyświetla wszystkie zdarzenia z ustawionym przynajmniej znacznikiem Record.
- **All** wyświetla wszystkie zdarzenia z ustawionym znacznikiem Watch lub Record.

W dowolnym trybie widoku po zaprogramowaniu zdarzenia przed tytułem programu pojawia się ikona informująca, czy dana pozycja będzie oglądana, nagrywana czy obie te rzeczy jednocześnie. Pozycje zaprogramowane mogą być dodawane i usuwane na dwa sposoby:

- 1** W dowolnym widoku wybierz zdarzenie, które chcesz zaprogramować, kliknij prawym przyciskiem myszy, aby wyświetlić menu **Event**, następnie wybierz **Watch** lub **Record**, aby przełączyć umieszczanie danej pozycji na liście zaprogramowanych zdarzeń.
- 2** Na każdej liście przed zdarzeniami znajdują się trzy pola wyboru: lewe pole to znacznik Watch, a pole środkowe to znacznik Record. Kliknij je, aby zmienić ich zaznaczenie.

## Zakładka Searches

Zakładka Searches wyświetla listę zapisanych kryteriów wyszukiwania, łącznie z własną listą Favorite programów (patrz [Favorite Search](#) na stronie 49), która zawsze jest pierwszym rezultatem szukania na liście. Pole Szukanie tytułu jest automatycznie aktualizowane po jego kliknięciu.

- Aby utworzyć nowe wyszukiwanie, kliknij menu **Search**, następnie kliknij **New Search**. Zostanie wyświetlone okno dialogowe Search.
- Aby edytować zapisane wyszukiwanie, kliknij dwukrotnie tytuł wyszukiwania lub wyświetl okno dialogowe Search (w sposób opisany wyżej) następnie kliknij **Load Search**.

## Ustawianie parametrów wyszukiwania

Aby rozpocząć nowe wyszukiwanie, w menu **Search**, kliknij **New Search ...** aby otworzyć okno dialogowe Search, w którym można określić następujące opcje:

|                           |                                                                                                                                                                               |
|---------------------------|-------------------------------------------------------------------------------------------------------------------------------------------------------------------------------|
| <b>Stations</b>           | Wybierz <b>All</b> lub <b>None</b> używając odpowiednich przycisków na dole listy. Aby używać wybranych stacji kliknij nazwy stacji, aby je zaznaczyć.                        |
| <b>Program Categories</b> | Wybierz <b>All</b> lub <b>None</b> używając odpowiednich przycisków na dole listy. Aby używać wybranych kategorii kliknij nazwy kategorii, aby je zaznaczyć.                  |
| <b>Date/Time Ranges</b>   | Z rozwijalnego menu wybierz zakresy dat. Pola wyboru służą do wyboru godzin, które należy uwzględnić w wyszukiwaniu.                                                          |
| <b>Rating</b>             | Podświetl jedną lub kilka pozycji na liście, aby wyszukiwać filmy o określonej ocenie.                                                                                        |
| <b>MPAA</b>               | Podświetl jedną lub kilka pozycji na liście, aby wyszukiwać filmy o określonej klasyfikacji MPAA.                                                                             |
| <b>Parental Guidance</b>  | Podświetl jedną lub kilka pozycji na liście, aby wyszukiwać filmy o określonej klasyfikacji.                                                                                  |
| <b>Text Search</b>        | Wpisz nazwy, tytuły i słowa kluczowe do pola tekstowego. Zaznacz pola <b>Title</b> , <b>Description</b> i <b>Performers</b> , aby wyszukiwać w tekście odpowiednie parametry. |
| <b>Year of Release</b>    | Używaj list rozwijalnych do wyszukiwania filmów przed, po oraz pomiędzy określonymi datami.                                                                                   |

Ikony na górze okna dialogowe Search do:

- tworzenia nowego wyszukiwania,
- ładowania poprzedniego wyszukiwania,
- zapisywania bieżących kryteriów wyszukiwania,
- uruchomienia bieżącego wyszukiwania,
- zamknięcia okna dialogowego wyszukiwania.

## Zakładka Sports

Zakładka Sports wyświetla po lewej stronie ekranu wszystkie podkategorie dla wszystkich wydarzeń sportowych w bieżących listach. Kliknij po lewej stronie ekranu kategorię, którą chcesz oglądać, aby wyświetlić wszystkie tytuły dla tej kategorii. Tytuły pojawią się z prawej strony ekranu.

- Jeśli zaznaczyłeś pole wyboru **Use Station List** w opcjach **Filter** (patrz *Opcje Filter* na stronie 48), wyświetlane będą jedynie stacje w bieżącej liście stacji.
- Klawiszami strzałek można przewijać w górę, w dół, w lewo i w prawo. Można także ją przewijać suwakami w pionie i w poziomie.
- Przewinięcie listy do danego programu spowoduje wyświetlenie szczegółowej informacji o nim ponad spisem programów.
- Aby wyświetlać jedynie wybrane stacje, użyj opcji **Station Lists ...** z menu **Edit** (patrz *Dostosowywanie kanałów* na stronie 45).

## Zakładka Stations

Zakładka Stations wyświetla po lewej stronie ekranów listy programów dla każdej stacji. Kliknij żądaną stację lub klawiszami strzałek przesunij ją w górę i w dół listy. Po prawej stronie ekranu wyświetlana jest lista programów tych stacji.

W zakładce Stations można przeglądać listy na dwa sposoby. Opcja **Format** w zakładce Stations steruje sposobem wyświetlania list:

- 1 Widok Log** jest widokiem standardowym. Każda ze stacji ma swój własny przewijalny spis programów.
  - 2 Widok Grid** można włączyć poprzez opcję **Tryb Grid** w menu **View** (patrz *Widoki* na stronie 47). Każda stacja wyświetlana jest z 24-godzinna siatką.
- Klawiszami strzałek można przewijać listę w górę i w dół. Można także ją przewijać suwakami w pionie i w poziomie.

- Przewinięcie listy do danego programu spowoduje wyświetlenie szczegółowej informacji o nim ponad listą.
- Aby wyświetlać jedynie wybrane stacje, użyj opcji **Station Lists ...** z menu **Edit** (patrz *Dostosowywanie kanałów* na stronie 45).

### Zakładka Titles

Zakładka Titles wyświetla po lewej stronie ekranu wszystkie tytuły w bieżącej liście. Kliknij dany tytuł, aby wyświetlić po prawej stronie ekranu wszystkie pory nadawania tego programu.

- Klawiszami strzałek można przewijać listę w górę i w dół. W polu tekstowym powyżej listy Tytułów możesz także wpisać częściową lub pełną nazwę danego titles, aby szybko do niego przejść.
- Przewinięcie listy do danego programu spowoduje wyświetlenie szczegółowej informacji o nim ponad spisem programów.
- Aby wyświetlać jedynie wybrane stacje, użyj opcji **Station Lists ...** z menu **Edit** (patrz *Dostosowywanie kanałów* na stronie 45).

### Dni i daty

Każdy tryb widoku wyświetla listy programów dla bieżącego dnia. Aby zmienić dany dzień, wybierz go z menu **Dates** na górze ekranu.

## Galeria obrazów statycznych

Klatki przechwycone z TV, Video CD lub File Player są zapisywane w Galerii obrazów statycznych. Obrazy można nagrywać w wielu formatach i rozmiarach.

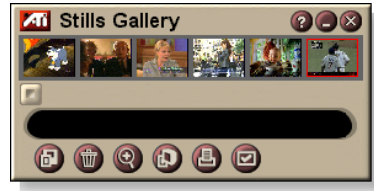

Przyciskami Galerii obrazów statycznych można usuwać obrazy, ukrywać je, zapisywać jako tapetę oraz drukować.

### **Uwaga**

Zamknięcie galerii bez zapisania jej zawartości powoduje **usunięcie** wszystkich klatek.

Kliknięcie logo znajdującego się w lewym górnym rogu panelu wyświetlania powoduje wyświetlenie komunikatu "Informacje...". Jeśli zainstalowano kilka narzędzi, na pasku zadań będą wyświetlane narzędzia dostępne i aktywne.

*Więcej informacji o przyciskach Galerii obrazów statycznych można znaleźć w Pomocy podręcznej oraz Podpowiedziach narzędzi.*

## Ustawienia Galerii obrazów statycznych

W Galerii obrazów statycznych można określić sposób zapisywania i drukowania przechwyconych obrazów.

## Ustawienie Galerii obrazów statycznych

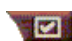

Naciśnij przycisk Ustawienia w Panelu sterowania Galeria obrazów statycznych, TV, File Player lub Video CD a następnie wybierz kartę **Galeria obrazów statycznych**.

|                                     |                                                                                                                                                                                                                                                                                                                                                                                                                                                                                                                                                                                           |                |                            |                  |                                                |          |                                      |
|-------------------------------------|-------------------------------------------------------------------------------------------------------------------------------------------------------------------------------------------------------------------------------------------------------------------------------------------------------------------------------------------------------------------------------------------------------------------------------------------------------------------------------------------------------------------------------------------------------------------------------------------|----------------|----------------------------|------------------|------------------------------------------------|----------|--------------------------------------|
| <p><b>Opcje przechwytywania</b></p> | <p><b>Przechwytnij do Galerii</b><br/>Przechwytnuje obrazy statyczne do Galerii obrazów statycznych.</p> <p><b>Przechwytnij do numerowanych plików</b><br/>Zapisuje przechwytnone obrazy do numerowanych plików (pic001.bmp, pic002.bmp ...) na twardym dysku.</p> <p><b>Przechwytnij do Schowka</b><br/>Umieszcza przechwytnone obrazy w Schowku Windows.</p> <p><b>Przechwytnij na drukarkę</b><br/>Wysyła przechwytnone obrazy na drukarkę.</p> <p><b>Używaj tylko 256 kolorów</b><br/>Zapisuje przechwytnone obrazy jako pliki o 256 kolorach, aby zaoszczędzić miejsca na dysku.</p> |                |                            |                  |                                                |          |                                      |
| <p><b>Opcje zapisywania</b></p>     | <p><b>Ostrzegaj o zamykaniu bez zapisywania</b><br/>Ostrzega przed zamknięciem TV lub Galerii obrazów statycznych bez zapisania przechwytnonych obrazów.</p> <p><b>Wyświetlaj ścieżki do plików z obrazami</b><br/>Wyświetla napęd, foldery oraz podfoldery, gdzie przechowywane są nagrywane obrazy.</p>                                                                                                                                                                                                                                                                                 |                |                            |                  |                                                |          |                                      |
| <p><b>Podpowiedzi narzędzi</b></p>  | <p><b>Wyświetlaj Podpowiedzi narzędzi</b><br/>Wyświetla Podpowiedzi narzędzi dla przycisków w Galerii obrazów statycznych.</p> <p><b>Wyświetlaj skróty</b><br/>Wyświetla klawisze skrótu dla przycisków Galerii obrazów statycznych.</p>                                                                                                                                                                                                                                                                                                                                                  |                |                            |                  |                                                |          |                                      |
| <p><b>Zawsze na wierzchu</b></p>    | <p>Umieszcza Galerię obrazów statycznych na wierzchu innych aplikacji.</p>                                                                                                                                                                                                                                                                                                                                                                                                                                                                                                                |                |                            |                  |                                                |          |                                      |
| <p><b>Opcje wydruku</b></p>         | <p><b>Wycentruj obraz</b><br/>Drukuje obraz na środku strony.</p> <p><b>Rozmiar obrazu:</b></p> <table border="0"> <tr> <td>Maksymalizacja</td> <td>Drukuje na pełnej stronie.</td> </tr> <tr> <td>Jeden do jednego</td> <td>Drukuje o takim samym rozmiarze, jak oryginał.</td> </tr> <tr> <td>Podwójny</td> <td>Drukuje obraz o podwójnym rozmiarze.</td> </tr> </table>                                                                                                                                                                                                                | Maksymalizacja | Drukuje na pełnej stronie. | Jeden do jednego | Drukuje o takim samym rozmiarze, jak oryginał. | Podwójny | Drukuje obraz o podwójnym rozmiarze. |
| Maksymalizacja                      | Drukuje na pełnej stronie.                                                                                                                                                                                                                                                                                                                                                                                                                                                                                                                                                                |                |                            |                  |                                                |          |                                      |
| Jeden do jednego                    | Drukuje o takim samym rozmiarze, jak oryginał.                                                                                                                                                                                                                                                                                                                                                                                                                                                                                                                                            |                |                            |                  |                                                |          |                                      |
| Podwójny                            | Drukuje obraz o podwójnym rozmiarze.                                                                                                                                                                                                                                                                                                                                                                                                                                                                                                                                                      |                |                            |                  |                                                |          |                                      |



## CD Audio

Narzędziem CD Audio można odtwarzać standardowe dźwiękowe płyty CD. Dostępne są zaawansowane opcje, takie jak Odtwarzanie przypadkowe, Odtwarzanie początków utworów (10 pierwszych sekund każdej ścieżki) oraz Odtwarzanie zapętłone. Narzędzie Terminarz pozwala na zaprogramowanie odtwarzania CD w określonych dniach i godzinach (patrz [Terminarz](#) na stronie 83).

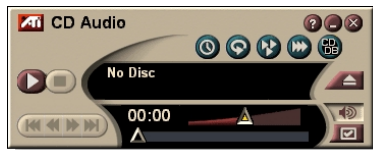

Kliknięcie logo znajdującego się w lewym górnym rogu panelu wyświetlania powoduje wyświetlenie komunikatu "Informacje...". Jeśli zainstalowano kilka narzędzi, na pasku zadań będą wyświetlane narzędzia dostępne i aktywne.

*Więcej informacji o przyciskach CD Audio można znaleźć w Pomocy podręcznej oraz Podpowiedziach narzędzi.*

### Aby uruchomić CD Audio

#### z paska LaunchPad

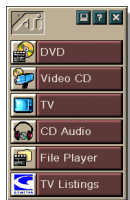

Na pasku LaunchPad naciśnij CD Audio. Więcej informacji o pasku LaunchPad można znaleźć na [stronie 8](#).

#### z Paska zadań Windows®

- 1 Na pasku zadań Windows naciśnij **Start**.
- 2 Wskaż **Programy** ►.
- 3 Wskaż **ATI Multimedia Center** ►.
- 4 Kliknij **CD Audio**.

 CD Audio można także uruchomić z innych narzędzi Multimedia Center — DVD, Video CD, TV oraz File Player. Kliknij logo ATI w lewym górnym rogu panelu sterowania danego narzędzia, a następnie naciśnij **CD Audio**.

## Ustawienia CD Audio

Na stronie Ustawień CD Audio można ustalić listę utworów, odtwarzanie w przypadkowej kolejności, a także wyświetlanie numeru ścieżki oraz czasu odtwarzania.

### Aby ustawić CD Audio

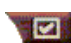

Naciśnij przycisk Ustaw na panelu sterowania CD Audio, a następnie wybierz kartę **Ustawienia CD Audio**.

|                                |                                                                                                                                                                                                        |
|--------------------------------|--------------------------------------------------------------------------------------------------------------------------------------------------------------------------------------------------------|
| <b>Lista utworów</b>           | Wyświetla wszystkie ścieżki na liście wybranych utworów.                                                                                                                                               |
| <b>Odtwarzanie przypadkowe</b> | <p><b>Przetasuj wszystkie ścieżki</b><br/>Odtwarza wszystkie ścieżki w przypadkowej kolejności.</p> <p><b>Przetasuj własną listę utworów</b><br/>Odtwarza listę utworów w przypadkowej kolejności.</p> |
| <b>Informacja o dysku</b>      | Wyświetla tytuł dysku i wykonawcę, jeśli informacje te są dostępne. Dane te można też wpisać samodzielnie.                                                                                             |
| <b>Dostępne ścieżki</b>        | Wyświetla ścieżki, które można dodać do listy utworów. Przyciski pozwalają dodawać i usuwać wybrane ścieżki lub wszystkie ścieżki.                                                                     |
| <b>Wyświetlacz LCD</b>         | Zaznacz, aby wyświetlacz LCD podawał numer ścieżki oraz bieżący czas odtwarzania.                                                                                                                      |
| <b>Podpowiedzi narzędzi</b>    | <p><b>Wyświetlaj podpowiedzi narzędzi</b><br/>Wyświetla podpowiedzi przy wskazywaniu przycisku myszą.</p> <p><b>Wyświetlaj skróty</b><br/>Wyświetla klawisze skrótu przy wskazywaniu przycisku.</p>    |

## Baza danych CD

W przypadku połączenia do Internetu, można skorzystać z bazy danych CD do wyświetlania tytułu utworu, wykonawcy, tytułów piosenek i innych informacji w trakcie odtwarzania przez komputer dysku CD.

Po włożeniu płyty audio CD do napędu CD-ROM, program CD Audio może poszukać w ogólnodostępnym serwerze CDDB<sup>©</sup> informacji o odgrywanej płycie. Jeśli informacje te znajdują się w bazie danych, program CD Audio ładuje i wyświetla dane.

- Dostęp do usługi CDDB dla użytkowników indywidualnych jest bezpłatny.

### Otwieranie strony bazy danych CD Audio

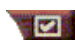

Kliknij przycisk w panelu sterowania CD Audio, a następnie wybierz kartę **Baza danych CD**.

|                                                                                             |                                                                                                                                                                                                                                                                                                                                                                                                      |
|---------------------------------------------------------------------------------------------|------------------------------------------------------------------------------------------------------------------------------------------------------------------------------------------------------------------------------------------------------------------------------------------------------------------------------------------------------------------------------------------------------|
| <p><b>Serwer</b><br/>Adres serwera CDDB<br/>(domyślny: cddb.cddb.com)</p>                   | <p><b>Port</b><br/>Port komunikacji z danym serwerem CDDB (domyślnie: 8880).</p> <p><b>Ściągnij listę ośrodków z serwera</b><br/>Uzyskuje listę domen (ośrodków) z serwera, przy użyciu bieżących ustawień.</p>                                                                                                                                                                                      |
| <p><b>Protokół</b></p>                                                                      | <p><b>CDDBP</b><br/>Użyj bezpośredniego połączenia TCP/IP.</p> <p><b>HTTP</b><br/>Użyj protokołu HTTP jeśli sieć używa bariery ochronnej (firewall). Musi być zdefiniowany skrypt CGI (domyślnie: /-cddb/cddb.cgi)</p>                                                                                                                                                                               |
| <p><b>Serwer pośredniczący</b><br/>Dostęp do bazy danych za pośrednictwem serwera proxy</p> | <p><b>Serwer</b><br/>Adres serwera pośredniczącego (proxy) (Jest to wydzielony komputer w sieci lokalnej, który ma bezpośrednie przyłącze do Internetu i udostępnia je, chroniąc jednocześnie sieć lokalną przed dostępem z zewnątrz).</p> <p><b>Port</b><br/>Port dostępu do serwera zastępczego.</p> <p><b>Niezbędna identyfikacja klienta</b><br/>Dany serwer zastępczy wymaga identyfikacji.</p> |

|                                                                                    |                                                                                                                                                                                                                                                                                        |
|------------------------------------------------------------------------------------|----------------------------------------------------------------------------------------------------------------------------------------------------------------------------------------------------------------------------------------------------------------------------------------|
| <b>Dial-Up Networking</b><br>Dostęp do serwera poprzez linię komutowaną (dial-up). | <b>Przy wysyłaniu zdalnych zapytań użyj tego połączenia</b><br>Przy braku połączenia, połączenie z serwerem następuje poprzez wybranie tej pozycji.<br><b>Przesyłaj zdalne zapytania jedynie przy połączeniu</b><br>Dostęp do bazy danych możliwy jedynie po wcześniejszym połączeniu. |
| <b>Wyłącz bazę danych CD</b>                                                       | Gdy ta opcja jest zaznaczona, nie są przesyłane żadne zapytania.                                                                                                                                                                                                                       |

### Ustawienia Terminarza CD Audio

Można zaprogramować włączanie się CD Audio w określonych dniach i godzinach. W przypadku zainstalowania odpowiednich programów, zdarzenia w terminarzu można planować także dla TV Magazine, Magnetowidu cyfrowego, programu File Player i TV.

#### Aby wyświetlić stronę ustawień Terminarza CD Audio

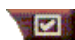

Naciśnij przycisk Ustawienia na panelu sterowania CD Audio, a następnie wybierz kartę **Terminarz**. Kreator inicjalizacji Terminarza pomoże przy tworzeniu nowych zaplanowanych zdarzeń. Więcej informacji podano w rozdziale [Terminarz](#) na stronie 83.

## Video CD

Video CD odtwarza dyski CD w formatach Video CD 1.0 CD i Karaoke CD.

Kliknięcie logo znajdującego się w lewym górnym rogu panelu wyświetlenia powoduje wyświetlenie komunikatu "Informacje...". Jeśli zainstalowano kilka narzędzi, na pasku zadań będą wyświetlane narzędzia dostępne i aktywne.

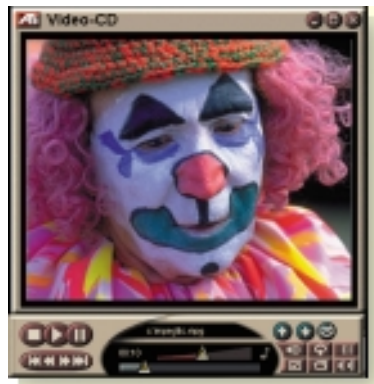

*Więcej informacji o przyciskach Video CD można znaleźć w Pomocy podręcznej oraz Podpowiedziach narzędzi.*

### Aby uruchomić Video CD

#### z paska LaunchPad

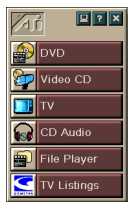

Kliknij **Video CD** na Pasku uruchamiania. Więcej informacji o Pasku LaunchPad można znaleźć na [stronie 8](#).

#### Z paska zadań Windows®

- 1** Na pasku zadań Windows naciśnij przycisk **Start**.
- 2** Wskaż **Programy ▶**.
- 3** Wskaż **ATI Multimedia Center ▶**.
- 4** Kliknij **Video CD**.

 Video CD można także uruchomić z innych narzędzi Multimedia Center — TV, CD Audio, File Player lub DVD. Kliknij logo ATI w lewym górnym rogu panelu sterowania danego narzędzia, a następnie naciśnij **Video CD**.

## Menu sterowania Video CD

Funkcje programu Video CD są dostępne z panelu sterowania lub po kliknięciu prawym przyciskiem myszy w obszarze wyświetlania wideo. Jest to korzystne przy wyświetlaniu na pełnym ekranie. Dostępne są poniższe pozycje menu:

|                                 |                                        |                                        |
|---------------------------------|----------------------------------------|----------------------------------------|
| <b>Ustawienia</b>               | Wyświetla okno ustawień Video CD.      |                                        |
| <b>Wysuń CD</b>                 | Wysuwa dysk Video CD z napędu.         |                                        |
| <b>Odtwarzanie</b>              | Odtwarza załadowany dysk Video CD.     |                                        |
| <b>Pauza</b>                    | Wstrzymuje odtwarzanie.                |                                        |
| <b>Stop</b>                     | Zatrzymuje odtwarzanie.                |                                        |
| <b>Rozmiar ekranu</b>           | <b>50%</b>                             | Wyświetla obraz o rozmiarze 1/2.       |
|                                 | <b>75%</b>                             | Wyświetla obraz o rozmiarze 3/4.       |
|                                 | <b>100%</b>                            | Wyświetla obraz o pełnym rozmiarze.    |
|                                 | <b>200%</b>                            | Wyświetla obraz o rozmiarze podwójnym. |
|                                 | <b>Pełny ekran</b>                     | Obraz pełnoekranowy bez ramek.         |
| <b>Wyświetl przyciski ster.</b> | Wyświetla panel sterowania.            |                                        |
| <b>Kanały dźwięku</b>           | Wybiera ścieżkę audio na dyskach MPEG: |                                        |
|                                 | <b>Stereo</b>                          | Odtwarzanie dźwięku stereo.            |
|                                 | <b>Oba kanały</b>                      | Aktywne są oba kanały dźwięku.         |
|                                 | <b>Kanał lewy</b>                      | Słyszalny jest tylko lewy kanał.       |
|                                 | <b>Kanał prawy</b>                     | Słyszalny jest tylko prawy kanał.      |
| <b>Skala filmu</b>              | <b>Czas</b>                            | Wyświetlany jest czas aktualny.        |
|                                 | <b>Klatki</b>                          | Wyświetlana jest liczba klatek.        |
|                                 | <b>Czas pozostały</b>                  | Wyświetlany jest pozostały czas dysku. |
|                                 | <b>Łączny czas</b>                     | Wyświetlany jest całkowity czas dysku. |
| <b>Powiększenie</b>             | <b>Zmniejsz pow.</b>                   | Powrót do normalnej skali obrazu.      |
|                                 | <b>Powiększenie 2x</b>                 | Powiększenie dwukrotne.                |
|                                 | <b>Powiększenie 4x</b>                 | Powiększenie czterokrotne.             |
|                                 | <b>Powiększenie 8x</b>                 | Powiększenie ośmiokrotne.              |
| <b>Informacje...</b>            | Wyświetla okno dialogowe Informacje... |                                        |
| <b>Zakończ</b>                  | Zamyka program Video CD.               |                                        |

## Przechwytywanie pojedynczych klatek z dysków Video CD

### Aby przechwytywać stop klatki z dysków Video CD

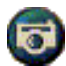

Kliknij przycisk Aparatu na panelu sterowania Video CD. Bieżąca klatka zostanie umieszczona w Galerii obrazów statycznych (patrz *Galeria obrazów statycznych* na stronie 55).

## Powiększanie i przesuwanie obrazu

Możliwe jest powiększenie fragmentu obrazu wideo w panelu i przywracanie jego normalnego rozmiaru.

### Aby powiększyć obraz

Kliknij w obrębie panelu wideo, po czym, przytrzymując wciśnięty klawisz myszy, przeciągnij mysz, zaznaczając prostokąt wokół obszaru do powiększenia.

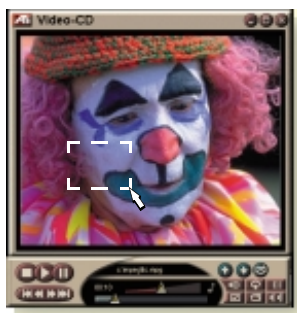

Można też kliknąć prawym przyciskiem myszy przycisk 1:1, by wyświetlić menu zawierające różne poziomy powiększenia: Powiększenie x2, Powiększenie x4 lub Powiększenie x8.

### Aby przesunąć obszar powiększony

Przemieszczaj mysz w obrębie obszaru powiększenia.

### Aby jeszcze bardziej powiększyć obszar powiększony

Przytrzymaj wciśnięty klawisz Shift i zaznacz kolejny prostokąt w powiększonym uprzednio obszarze.

### Aby przywrócić normalną wielkość obrazu lub wybrać określony stopień powiększenia

Kliknij prawym przyciskiem myszy w obrębie wyświetlacza wideo, by wyświetlić menu sterowania (patrz *Menu sterowania Video CD* na stronie 62), kliknij pozycję Powiększenie i wybierz Zmniejsz powiększenie, Powiększenie x2, Powiększenie x4 lub Powiększenie x8.

Można też kliknąć przycisk 1:1 lub kliknąć ten przycisk prawym przyciskiem myszy, by wyświetlić menu zawierające różne poziomy powiększenia: Powiększenie x2, Powiększenie x4 lub Powiększenie x8.

## Ustawienia wyświetlania Video CD

Na stronie ustawień wyświetlacza Video CD można ustawić rozmiar okna oraz opcje ogólne.

### Aby wyświetlić Ustawienia wyświetlania Video CD

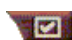

Naciśnij przycisk Ustawienia na panelu sterowania Video CD i kartę **Wyświetlanie**.

|                                                            |                                                                                                                                                                                                                               |
|------------------------------------------------------------|-------------------------------------------------------------------------------------------------------------------------------------------------------------------------------------------------------------------------------|
| <b>Rozmiar obrazu wideo</b>                                | Wybiera rozmiar okna odtwarzania: 50%, 75%, 100%, 200% lub Pełny ekran.                                                                                                                                                       |
| <b>Podpowiedzi narzędzi</b>                                | <p><b>Wyświetlaj Podpowiedzi narzędzi</b><br/>Wyświetla Podpowiedzi narzędzi przy wskazywaniu przycisków myszą.</p> <p><b>Wyświetlaj klawisze skrótu</b><br/>Wyświetla klawisze skrótu przy wskazywaniu przycisków myszą.</p> |
| <b>Zawsze na wierzchu</b>                                  | Wyświetla okno Video CD zawsze na wierzchu innych aplikacji.                                                                                                                                                                  |
| <b>Zachowuj współczynnik rozmiaru ekranu</b>               | Zachowuje proporcję między szerokością a wysokością przy zmianie rozmiaru lub powiększaniu okna wyświetlania.                                                                                                                 |
| <b>Automatycznie ukrywaj przyciski przy pełnym ekranie</b> | Automatycznie ukrywa przyciski sterujące Video CD przy odgrywaniu na pełnym ekranie.                                                                                                                                          |



## Ustawienia preferencji Video CD

Na stronie ustawień preferencji Video CD można ustawić ogólne parametry odtwarzacza.

### Aby wyświetlić stronę ustawień preferencji Video CD

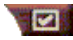

Naciśnij przycisk Ustawienia na panelu sterowania Video CD, a następnie wybierz kartę **Preferencje**.

|                                        |                                                                                                                                                                                                                                                                                                                                                                                                                                                                    |
|----------------------------------------|--------------------------------------------------------------------------------------------------------------------------------------------------------------------------------------------------------------------------------------------------------------------------------------------------------------------------------------------------------------------------------------------------------------------------------------------------------------------|
| <p><b>Skala filmu</b></p>              | <p><b>Wyświetlaj klatki</b><br/>Wyświetla pozycję w klatkach.</p> <p><b>Wyświetlaj czas</b><br/>Wyświetla pozycję w jednostkach czasu.</p> <p><b>Wyświetlaj łączny czas</b><br/>Wyświetla łączny czas odtwarzania płyty Video CD lub pliku.</p> <p><b>Wyświetlaj czas pozostały do końca</b><br/>Wyświetla czas pozostały do końca odtwarzania Video CD lub pliku.</p>                                                                                             |
| <p><b>Ustawienia ogólne</b></p>        | <p>Automatyczne odtworzenie załadowanego dysku CD.</p>                                                                                                                                                                                                                                                                                                                                                                                                             |
| <p><b>Zarządzanie poborem mocy</b></p> | <p>Wybierz jeden z poniższych poziomów:</p> <p><b>Zawsze</b><br/>Zarządzanie poborem mocy jest zawsze aktywne.</p> <p><b>Wyłączone przy odtwarzaniu</b><br/>Zarządzanie poborem mocy jest wyłączone w trakcie odtwarzania dysku CD.</p> <p><b>Pozwól na wyłączenie wyświetlania przy wstrzymaniu odtwarzania</b><br/>Przy wstrzymaniu odtwarzania wyłączony zostaje wyświetlacz.</p> <p><b>Wyłączone</b><br/>Zarządzanie poborem mocy jest na stałe wyłączone.</p> |

## Ustawienia galerii obrazów statycznych Video CD

Istnieje możliwość przechwytywania pojedynczych klatek z filmów Video CD i zapisywania ich w galerii obrazów statycznych.

### Aby wyświetlić stronę ustawień galerii obrazów statycznych Video CD

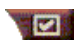

Naciśnij przycisk Ustawienia w panelu sterowania Video CD, następnie wybierz kartę **Galeria obrazów statycznych**. Więcej informacji na temat galerii klatek zawiera rozdział *Galeria obrazów statycznych* na stronie 55.

## DVD

DVD (Digital Versatile Disc) jest standardem magazynowania danych o wysokiej gęstości zapisu, który pozwala na przechowanie do 17 gigabajtów pamięci, czyli 25 razy więcej niż standardowy dysk CD-ROM. Dzięki tej znacznie zwiększonej pojemności użytkownicy mogą oglądać pełne filmy i cieszyć się grami, które wymagały wcześniej przekładania wielu płyt CD.

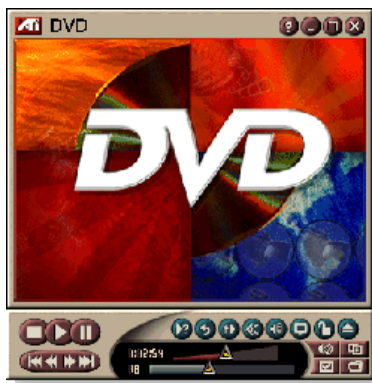

Wiele tytułów DVD udostępnia nowe funkcje: interakcyjne menu, wybór języków, napisy w językach obcych, wiele kątów widzenia i wiele więcej opcji. Nowe technologie obrazu i dźwięku, takie jak kompresja obrazu MPEG-2, pozwala na rozkoszowanie się nowymi utworami muzycznymi i multimedialnymi.

Kliknięcie logo znajdującego się w lewym górnym rogu panelu wyświetlania powoduje wyświetlenie komunikatu "Informacje...". Jeśli zainstalowano kilka narzędzi, na pasku zadań będą wyświetlane narzędzia dostępne i aktywne.

*Więcej informacji o przyciskach DVD można znaleźć w Pomocy podręcznej oraz Podpowiedziach narzędzi.*

### Aby uruchomić DVD

#### z paska LaunchPad

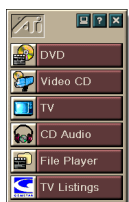

Kliknij pozycję **DVD** na Pasku LaunchPad. Więcej informacji o Pasku LaunchPad podano na [stronie 8](#).

#### z paska narzędzi Windows®

- 1 Na pasku narzędzi Windows naciśnij pozycję **Start**.
- 2 Wskaż **Programy** ►.
- 3 Wskaż **ATI Multimedia Center** ►.
- 4 Kliknij **DVD**.

 DVD można także uruchomić z innych narzędzi zainstalowanych w komputerze — TV, Video CD, File Player oraz CD Audio. Kliknij na logo ATI w lewym górnym rogu panelu sterowania danego narzędzia, i wybierz **DVD**.

## Jaki materiał można odtwarzać z dysku DVD?

Można odtwarzać wszystkie dyski zgodne ze standardem DVD Video Disc 1.0, łącznie z dyskami interaktywnymi i zaszyfrowanymi (chronionymi przed kopiowaniem).

## Zmienianie rozmiaru panelu wyświetlania wideo

Można zmienić rozmiar wyświetlania panelu przez przeciąganie myszką jego brzegu, lub przez naciskanie klawisza CTRL, które przełącza między standardowymi rozmiarami ekranu:

|                             |                  |
|-----------------------------|------------------|
| 50% oryginalnego rozmiaru.  | CTRL+1           |
| 75% oryginalnego rozmiaru.  | CTRL+2           |
| 100% oryginalnego rozmiaru. | CTRL+3           |
| Pełny ekran                 | CTRL+4<br>CTRL+F |

## Przyciski przy wyświetlaniu na pełnym ekranie

Przy odtwarzaniu  dysków DVD w trybie pełnoekranowym, na dole ekranu pojawiają się przyciski odtwarzacza. Poniższymi klawiszami można powrócić do wyświetlania obrazu wideo w oknie lub przełączyć wyświetlanie przycisków sterowania przy wyświetlaniu obrazu na pełnym ekranie.

|          |                                                                                  |
|----------|----------------------------------------------------------------------------------|
| Ctrl + F | Wyjście z trybu pełnoekranowego.                                                 |
| F2       | Przełączanie wyświetlania przycisków przy wyświetlaniu obrazu na pełnym ekranie. |

## Odtwarzanie dysków Video DVD

Wszystkie odtwarzacze i sterowniki DVD są w stanie czytać płyty **audio CD** oraz **CD-ROM** a także odtwarzać muzykę z płyt formatu **Enhanced CD** (CD Plus, CD Extra).

### Aby odtwarzać dyski DVD

Włóż dysk DVD do napędu DVD, po czym kliknij przycisk Odtwarzaj DVD w oknie dialogowym Otwórz plik.

## Wybór strumieni dźwięku

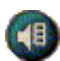

Przy odtwarzaniu standardowych dysków Video DVD o wielu strumieniach dźwięku, kliknięcie przycisku kanału dźwięku wyświetla wyskakujące menu z dostępnymi kanałami dźwięku. Zaznaczony kanał jest kanałem aktywnym.

- Na wszystkich dyskach Video DVD znajdować się może do 8 kanałów dźwięku.

## Ustawianie napisów

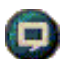

Kliknięcie przycisku wyboru napisów w panelu sterowania DVD wyświetla menu wyboru języków napisów. Naciśnij na dany język napisów. Zaznaczony język jest językiem aktywnym.

- Na wszystkich dyskach Video DVD znajdować się może do 32 kodowanych napisów w różnych językach.

## Korzystanie z menu

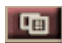

Kliknięcie na przycisk menu w panelu sterowania DVD wyświetla wyskakujące "nadmenu", w którym można wybrać menu podrzędne. Zwykle dyski Video DVD umożliwiają korzystanie z menu do sześciu poziomów:

- tytuł (zwykle całego filmu lub albumu),
- menu główne,
- dźwięk,
- podobraz (podobrazy są nakładane na okno wideo i zawierają napisy, karaoke, menu, prostą animację i podobne elementy),
- kąt widzenia,
- rozdział.

## Przeszukiwanie dysków DVD

Na zawartość dysku Video DVD składają się "tytuły" (filmy lub albumy) i "podtytuły" (rozdziały lub piosenki). Przyciskiem Wyszukaj można przejść do danego miejsca na dysku.

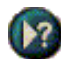

Kliknij przycisk Szukaj w panelu sterowania DVD, aby wyświetlić okno dialogowe przeszukiwania. Dyski DVD można przeszukiwać pod kątem:

- tytułu (zwykle całego filmu),
- tytułu i rozdziału (rozdział jest częścią tytułu),
- czasu w obrębie bieżącego tytułu i rozdziału w formacie GG:MM:SS:KK: GG=godzina, MM=minuta, SS=sekunda, KK=klatka).

## Wybór kąta widzenia

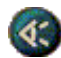

Kliknij przycisk Kąta widzenia na panelu sterowania DVD, aby wyświetlić menu kątów widzenia kamery. Pozycja zaznaczona jest aktywnym kątem widzenia.

- Nie wszystkie dyski Video DVD udostępniają wiele kątów widzenia; zawartość dysku DVD musi być zakodowana z zastosowaniem wielu perspektyw, by ta funkcja była dostępna.

## Zabezpieczenie przed dziećmi

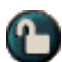

Narzędzie Zabezpieczenia przed dziećmi umożliwia ustawienie hasła dostępu do wybranych materiałów. Kliknięcie przycisku Zabezpieczenia przed dziećmi w panelu sterowania DVD powoduje wyświetlenie menu poziomu blokady przed dziećmi. Poziom zaznaczony jest poziomem wybranym.

- Przy wybraniu poziomu zabezpieczenia przed dziećmi pojawia się okno dialogowe hasło dostępu. W celu zmiany poziomu zabezpieczenia wymagane jest podanie hasła.

## Powiększanie i przesuwanie obrazu

Możliwe jest powiększenie tylko wybranego fragmentu obrazu wideo w panelu i przywrócenie jego normalnej wielkości.

### Aby powiększyć obraz

Kliknij w obrębę panelu wideo, po czym, przytrzymując wciśnięty klawisz myszy, przeciągnij mysz, zaznaczając prostokąt wokół obszaru do powiększenia.

 Można też kliknąć prawym przyciskiem myszy przycisk 1:1, by wyświetlić menu zawierające różne poziomy powiększenia: Powiększenie x2, Powiększenie x4 lub Powiększenie x8.

### Aby przesunąć obszar powiększony

Przemieszczaj mysz w obrębę obszaru powiększenia.

### Aby jeszcze bardziej powiększyć obszar powiększony

Przytrzymaj wciśnięty klawisz Shift i zaznacz kolejny prostokąt w powiększonym uprzednio obszarze.

### Aby przywrócić normalną wielkość obrazu lub wybrać określony stopień powiększenia

Kliknij prawym przyciskiem myszy w obrębę wyświetlacza wideo, by wyświetlić menu sterowania (patrz [Menu sterowania DVD](#) na stronie 72), kliknij pozycję Powiększenie i wybierz Zmniejsz powiększenie, Powiększenie x2, Powiększenie x4 lub Powiększenie x8.

 Można też kliknąć przycisk 1:1 lub kliknąć ten przycisk prawym przyciskiem myszy, by wyświetlić menu zawierające różne poziomy powiększenia: Powiększenie x2, Powiększenie x4 lub Powiększenie x8.

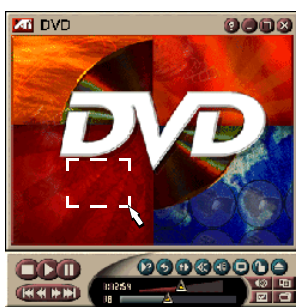

## Menu sterowania DVD

Niezależnie od użycia przycisków panelu sterowania, funkcje obsługi DVD są dostępne z menu wyświetlanego po kliknięciu obrazu wideo w panelu sterowania prawym przyciskiem myszy. Funkcja ta jest użyteczna przy odtwarzaniu plików w trybie pełnoekranowym. Dostępne są poniższe funkcje:

|                                     |                                                                                                                                        |
|-------------------------------------|----------------------------------------------------------------------------------------------------------------------------------------|
| <b>Ustawienia</b>                   | Otwiera stronę Preferencje.                                                                                                            |
| <b>Ukryj przyciski sterowania</b>   | Ukrywa przyciski sterowania trybu pełnoekranowego (patrz <a href="#">Przyciski przy wyświetlaniu na pełnym ekranie</a> na stronie 68). |
| <b>Wysuń</b>                        | Wysuwa dysk DVD z napędu.                                                                                                              |
| <b>Wznów</b>                        | Wznawia odtwarzanie po przerwie.                                                                                                       |
| <b>Odtwarzanie/Pauza</b>            | Przełącza między odtwarzaniem a wstrzymaniem odtwarzania.                                                                              |
| <b>Zatrzymaj odtwarzanie</b>        | Zatrzymuje odtwarzanie.                                                                                                                |
| <b>Odtwórz określony fragment</b>   | Wyszukuje określoną pozycję na dysku (patrz <a href="#">Przeszukiwanie dysków DVD</a> na stronie 70).                                  |
| <b>Ponownie uruchom program</b>     | Rozpoczyna odtwarzanie od początku.                                                                                                    |
| <b>Przejdź w górę</b>               | Przechodzi o pozycję w górę na liście utworów.                                                                                         |
| <b>Menu</b>                         | Wyświetla menu nadrzędne (patrz <a href="#">Korzystanie z menu</a> na stronie 70).                                                     |
| <b>Napisy</b>                       | Wyświetla menu wyboru języków (patrz <a href="#">Ustawianie napisów</a> na stronie 69).                                                |
| <b>Dźwięk</b>                       | Wyświetla menu strumieni dźwięku (patrz <a href="#">Wybór strumieni dźwięku</a> na stronie 69).                                        |
| <b>Kąt</b>                          | Wyświetla menu kątów patrzenia kamery (patrz <a href="#">Wybór kąta widzenia</a> na stronie 70).                                       |
| <b>Zabezpieczenie przed dziećmi</b> | Wyświetla menu poziomów blokady przed dziećmi.                                                                                         |
| <b>Szukaj</b>                       | Pozwala wyszukać dowolny tytuł lub rozdział.                                                                                           |
| <b>Powiększenie</b>                 | Powiększa 2x, 4x, 8x lub usuwa powiększenie.                                                                                           |
| <b>Informacje...</b>                | Wyświetla okno dialogowe Informacje...                                                                                                 |
| <b>Zakończ</b>                      | Zamyka DVD.                                                                                                                            |



## Ustawienia wyświetlania DVD

Na stronie ustawień wyświetlania można modyfikować sposób wyświetlania obrazu wideo przez DVD.

### Aby wyświetlić stronę ustawień wyświetlania

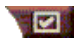

Naciśnij przycisk Ustawienia na panelu sterowania DVD i wybierz kartę **Wyświetlanie**.

|                                   |                                                                                                                                                                                                                                                                                                                                                                                                                                                                                                                                                                                                |
|-----------------------------------|------------------------------------------------------------------------------------------------------------------------------------------------------------------------------------------------------------------------------------------------------------------------------------------------------------------------------------------------------------------------------------------------------------------------------------------------------------------------------------------------------------------------------------------------------------------------------------------------|
| <b>Rozmiar wyświetlania</b>       | Wyświetla obraz o rozmiarze 50%, 75%, 100% oryginału lub na pełnym ekranie.                                                                                                                                                                                                                                                                                                                                                                                                                                                                                                                    |
| <b>Preferencje rozmieszczania</b> | <p>Dysk Video DVD może być wyświetlany w obrazie o rozmiarach 4:3 (proporcja rozmiarów zwykłego ekranu TV) lub 16:9 (ekran panoramiczny).</p> <p><b>Panoramyczny</b><br/>Wyświetla pełny obraz o rozmiarze 16:9 (dla telewizorów szerokoekranowych).</p> <p><b>Z paskami</b><br/>Wyświetla obraz z paskami na górze i dole ekranu (przy ekranie o proporcji 4:3, aby wyświetlić obraz o pełnej szerokości, ale za to krótszy).</p> <p><b>Całоекranowy (Pan &amp; Scan)</b><br/>Wyświetla obraz 16:9 tak, aby zmieścił się na standardowym ekranie; przy pełnej wysokości i 75% szerokości.</p> |
| <b>Opcje</b>                      | <p><b>Zachowuj współczynnik kształtu obrazu</b><br/>Zachowuje proporcje obrazu (stosunek szerokości do wysokości) przy zmianie rozmiaru ekranu.</p> <p><b>Zawsze na wierzchu</b><br/>Zawsze wyświetla odtwarzacz na wierzchu.</p> <p><b>Automatyczne ukrywanie na pełnym ekranie</b><br/>Automatycznie ukrywa przyciski sterowania jeśli brak sygnałów od użytkownika. Przyciski są automatycznie przywracane przy poruszeniu myszą.</p>                                                                                                                                                       |
| <b>Podpowiedzi narzędzi</b>       | <p><b>Wyświetlaj Podpowiedzi narzędzi</b><br/>Wyświetla pomocne podpowiedzi dla DVD.</p> <p><b>Wyświetlaj skróty</b><br/>Wyświetla klawisze skrótu.</p>                                                                                                                                                                                                                                                                                                                                                                                                                                        |

## Ustawienia preferencji DVD

Na stronie Preferencji można modyfikować sposób wyświetlania obrazu wideo w oknie DVD.

### Aby wyświetlić stronę ustawień wyświetlania

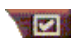

Naciśnij przycisk Ustawienia w panelu sterowania DVD, a następnie wybierz kartę **Preferencje**.

|                                                         |                                                                                                                                                                                                                                                                                                                                                                                                                                                                                                                                                                         |
|---------------------------------------------------------|-------------------------------------------------------------------------------------------------------------------------------------------------------------------------------------------------------------------------------------------------------------------------------------------------------------------------------------------------------------------------------------------------------------------------------------------------------------------------------------------------------------------------------------------------------------------------|
| <p><b>Preferowany język</b></p>                         | <p>Wybierz język pierwszego i drugiego wyboru.</p> <ul style="list-style-type: none"> <li>• Odtwarzacz automatycznie wybiera strumień dźwięku i napisów, które odpowiadają pierwszemu wyborowi.</li> <li>• Jeśli nie jest dostępny język pierwszego wyboru, wybierany jest język drugi.</li> <li>• Jeśli żaden z tych dwóch języków nie jest dostępny, odtwarzacz używa pierwszego dostępnego strumienia dźwięku i napisów.</li> <li>• Przyciskiem napisów można wybrać języki podczas odtwarzania (patrz <a href="#">Ustawianie napisów</a> na stronie 69).</li> </ul> |
| <p><b>Zarządzanie poborem mocy</b></p>                  | <p>Wybierz jedną z opcji:</p> <ul style="list-style-type: none"> <li>• <b>Zawsze</b> (zarządzanie poborem mocy jest zawsze aktywne).</li> <li>• <b>Nie przy odtwarzaniu</b></li> <li>• <b>Wyświetlanie wyłączone przy wstrzymaniu odtwarzania</b> (jedynie wyświetlanie zostaje wyłączone przy wstrzymaniu odtwarzania).</li> <li>• <b>Nigdy</b></li> </ul>                                                                                                                                                                                                             |
| <p><b>Zawsze włącz napisy</b></p>                       | <p>Zawsze wyświetla napisy.</p>                                                                                                                                                                                                                                                                                                                                                                                                                                                                                                                                         |
| <p><b>Wyświetlaj napisy przy wyciszonym dźwięku</b></p> | <p>Wyświetla napisy zawsze, gdy dźwięk jest wyciszony.</p>                                                                                                                                                                                                                                                                                                                                                                                                                                                                                                              |

## Ustawienia obrazu DVD

Strona Ustawienia wyświetlania pozwala dostosować parametry obrazu wideo. Dostępność opcji zależy od zainstalowanego w komputerze sprzętu.

### Aby wyświetlić kartę ustawień wideo dla DVD



Kliknij przycisk Ustawienia w panelu sterowania DVD, po czym kliknij kartę **Wideo**.

|                   |                                                                                                                                                     |
|-------------------|-----------------------------------------------------------------------------------------------------------------------------------------------------|
| <b>Jaskrawość</b> | Pozwala dobrać intensywność jasnych odcieni w obrazie.                                                                                              |
| <b>Gamma</b>      | Reguluje jasność kolorów obrazu. Im wyższy jest współczynnik gamma, tym większa jaskrawość i kontrast, przy czym maksimum oznacza brak modyfikacji. |
| <b>Nasylenie</b>  | Określa natężenie kolorów obrazu (zależne od ilości szarości w barwach).                                                                            |

## Napisy kodowane DVD

Napisy kodowane można wyświetlać na wierzchu okna obrazu wideo, lub w osobnym oknie obok okna z obrazem. Przy wyświetlaniu napisów w osobnym oknie można paskiem przewijania przeglądać kilka ostatnich minut tekstu, a także ustawić kolor tła, czcionkę oraz kolor czcionki tego okna.

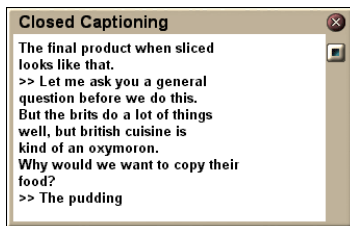

### **Uwaga**

Funkcja napisów kodowanych jest dostępna tylko w Ameryce Północnej.

### Aby wyświetlić tekst napisów kodowanych

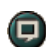

Kliknij przycisk Napisy kodowane na panelu sterowania DVD.

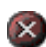

Aby zamknąć okno napisów kodowanych, kliknij przycisk zamknięcia.

## Ustawienia napisów kodowanych

Strona z ustawieniami napisów kodowanych pozwala określić sposób wyświetlania tekstu napisów kodowanych: na wierzchu okna z obrazem wideo lub w osobnym oknie, kolor tła, czcionkę oraz kolor czcionki w oknie. Można tu także ustawić i włączyć narzędzie HotWords oraz TV Magazine.

### Aby skonfigurować napisy kodowane

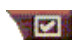

Naciśnij przycisk Ustawienia na panelu sterowania DVD, a następnie wybierz kartę **Napisy kodowane**.

|                                              |                                                                                                                                                                                                                                                                                                                                                                                                                                                                                                |
|----------------------------------------------|------------------------------------------------------------------------------------------------------------------------------------------------------------------------------------------------------------------------------------------------------------------------------------------------------------------------------------------------------------------------------------------------------------------------------------------------------------------------------------------------|
| <p><b>Umiejscowienie</b></p>                 | <p><b>Okno zewnętrzne</b><br/>Wyświetla tekst napisów kodowanych w osobnym oknie. Przyciskiem <b>Czcionka...</b> wybierz czcionkę wyświetlania.</p> <p><b>Okno obrazu wideo</b><br/>Wyświetla tekst napisów kodowanych na wierzchu okna obrazu wideo. Naciśnij <b>Czcionka...</b>, aby wybrać czcionkę wyświetlania.</p> <p><b>Tło pełne</b><br/>Wyświetla tekst napisów kodowanych na pełnym tle.</p> <p><b>Tło cieniowane</b><br/>Wyświetla tekst napisów kodowanych na cieniowanym tle.</p> |
| <p><b>Tekst kodowany przy wyciszeniu</b></p> | <p>Wyświetla tekst kodowany przy wyciszeniu.</p>                                                                                                                                                                                                                                                                                                                                                                                                                                               |

## Ustawienia Terminarza DVD

W przypadku zainstalowania odpowiednich programów, możliwe jest planowanie w Terminarzu zdarzeń dla TV Magazine, Magnetowidu cyfrowego, programu File Player i TV.

### Aby wyświetlić stronę ustawień Terminarza DVD



Naciśnij przycisk Ustawienia w panelu sterowania DVD, następnie wybierz kartę **Terminarz**. Kreator Terminarza pomoże przy programowaniu nowych zdarzeń. Więcej informacji podano w rozdziale [Terminarz](#) na stronie 83.

## Kody regionów

Stosowanych jest sześć kodów regionów ("kodów krajów"), które mają na celu uniemożliwienie odtwarzania niektórych dysków w poszczególnych regionach geograficznych. Odtwarzacze DVD nie będą odtwarzać dysków, które nie są odpowiednie dla danego regionu.

Po włożeniu do stacji dysku DVD, którego kod regionu odbiega od wartości aktualnie ustawionej, pojawi się okno dialogowe pozwalające zmienić lokalny kod regionu.

| <b><i>Kod regionu można zmienić tylko pięciokrotnie.</i></b> |                                                                                                           |
|--------------------------------------------------------------|-----------------------------------------------------------------------------------------------------------|
| <b>Region 1</b>                                              | Stany Zjednoczone, terytoria zależne Stanów Zjednoczonych oraz Kanada.                                    |
| <b>Region 2</b>                                              | Europa, Japonia, Bliski Wschód, Egipt, Południowa Afryka, Grenlandia.                                     |
| <b>Region 3</b>                                              | Tajwan, Korea, Filipiny, Indonezja, Hong Kong.                                                            |
| <b>Region 4</b>                                              | Meksyk, Ameryka Południowa, Ameryka Środkowa, Australia, Nowa Zelandia, Wyspy Oceanu Spokojnego, Karaiby. |
| <b>Region 5</b>                                              | Rosja, Europa Wschodnia, India, większość krajów Afryki, Korei Północnej, Mongolii.                       |
| <b>Region 6</b>                                              | Chiny                                                                                                     |

## File Player

File Player służy do odtwarzania plików multimedialnych. Rodzaje plików możliwych do odtworzenia zależą od oprogramowania zainstalowanego w komputerze. Na przykład, odtwarzanie pliku typu MPEG-2 jest możliwe pod warunkiem, że zainstalowany jest program w rodzaju ATI DVD Player.

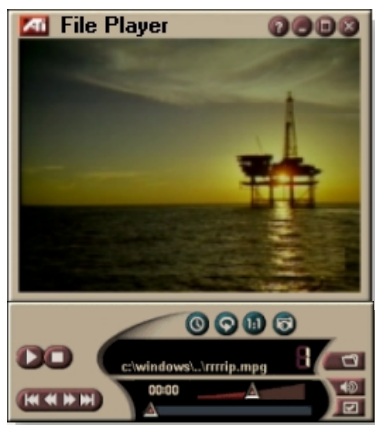

Odtwarzane mogą być następujące typy plików multimedialnych:

- AVI
- MPEG (.mpg, .mpeg)
- MP (.mp3, .mp2)
- MIDI (.mid)
- WAV (.wav)

*Więcej informacji o przyciskach programu File Player można znaleźć w Pomocy podręcznej oraz Podpowiedziach narzędzi.*

### Aby uruchomić program File Player

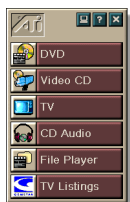

#### **z paska LaunchPad**

Kliknij przycisk **File Player** na pasku LaunchPad. Więcej informacji o Pasku LaunchPad można znaleźć na [stronie 8](#).

#### **z paska zadań Windows**

- 1** Na pasku zadań Windows kliknij przycisk **Start**.
- 2** Wskaż pozycję **Programy** ►.
- 3** Wskaż pozycję **ATI Multimedia Center** ►.
- 4** Kliknij pozycję **File Player**.

## Menu sterowania programu File Player

Dostęp do funkcji programu File Player możliwy jest za pośrednictwem menu wyświetlanego po kliknięciu panelu sterowania lub obszaru wyświetlania wideo prawym przyciskiem myszy. Jest to użyteczne przy odtwarzaniu plików w trybie pełnoekranowym. W menu dostępne są następujące pozycje:

|                                                        |                                                                                                            |
|--------------------------------------------------------|------------------------------------------------------------------------------------------------------------|
| <b>Ustawienia</b>                                      | Wyświetla okno ustawień programu File Player.                                                              |
| <b>Przełączanie wyświetlania przycisków sterowania</b> | Ukrywa panel sterowania File Player.                                                                       |
| <b>Odtwarzanie</b>                                     | Odtwarza bieżący plik.                                                                                     |
| <b>Stop</b>                                            | Zatrzymuje odtwarzanie.                                                                                    |
| <b>Tryb wyświetlania czasu</b>                         | <b>Ustaw tryb czasu:</b><br>Czas wykorzystany<br>Czas pozostały<br>Czas łączny                             |
| <b>Tryb powiększenia</b>                               | <b>Ustaw powiększenie:</b><br>Zmniejsz powiększenie, Powiększenie 2x,<br>Powiększenie 4x, Powiększenie 8x. |
| <b>Rozmiar wideo</b>                                   | <b>Ustaw rozmiar okna odtwarzania:</b><br>50%, 75%, 100%, 200%, Pełny ekran.                               |
| <b>Informacje...</b>                                   | Wyświetla okno dialogowe "Informacje".                                                                     |
| <b>Zakończ</b>                                         | Zamyka program File Player.                                                                                |

## Powiększanie i przesuwanie obrazu

Możliwe jest powiększenie fragmentu obrazu wideo w panelu i przywrócenie jego normalnej wielkości.

### Aby powiększyć obraz

Kliknij w obrębie panelu wideo, po czym, przytrzymując wciśnięty klawisz myszy, przeciągnij mysz, zaznaczając prostokąt wokół obszaru do powiększenia.

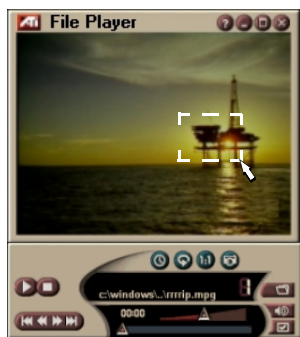

**i:** Można też kliknąć prawym przyciskiem myszy przycisk 1:1, by wyświetlić menu zawierające różne poziomy powiększenia: Powiększenie x2, Powiększenie x4 lub Powiększenie x8.

### Aby przesunąć obszar powiększony

Przemieszczaj mysz w obrębie obszaru powiększenia.

### Aby jeszcze bardziej powiększyć obszar powiększony

Przytrzymaj wciśnięty klawisz Shift i zaznacz kolejny prostokąt w powiększonym uprzednio obszarze.

### Aby przywrócić normalną wielkość obrazu lub wybrać określony stopień powiększenia

Kliknij prawym przyciskiem myszy w obrębie wyświetlacza wideo, by wyświetlić menu sterowania (patrz [Menu sterowania programu File Player](#) na stronie 79), kliknij pozycję Powiększenie i wybierz Zmniejsz powiększenie, Powiększenie x2, Powiększenie x4 lub Powiększenie x8.

**i:** Można też kliknąć przycisk 1:1 lub kliknąć ten przycisk prawym przyciskiem myszy, by wyświetlić menu zawierające różne poziomy powiększenia: Powiększenie x2, Powiększenie x4 lub Powiększenie x8.



## Ustawienia obrazu dla programu File Player

Okno Ustawienia obrazu pozwala określić sposób wyświetlania obrazu wideo w programie File Player.

### Aby wyświetlić okno Ustawienia obrazu

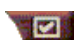

Kliknij przycisk Ustawienia na panelu sterowania programu File Player, a następnie kliknij kartę **Wyświetlanie**.

|                             |                                                                                                                                                                                                                                                                                                                                                                                                                                                                                                                                                                                                                                                                               |
|-----------------------------|-------------------------------------------------------------------------------------------------------------------------------------------------------------------------------------------------------------------------------------------------------------------------------------------------------------------------------------------------------------------------------------------------------------------------------------------------------------------------------------------------------------------------------------------------------------------------------------------------------------------------------------------------------------------------------|
| <b>Rozmiar wideo</b>        | Obraz wideo można wyświetlać przy rozmiarze 50%, 75%, 100%, 200% lub na pełnym ekranie.                                                                                                                                                                                                                                                                                                                                                                                                                                                                                                                                                                                       |
| <b>Opcje</b>                | <p><b>Wyświetlacz LCD</b><br/>Wyświetla numer ścieżki i aktualny czas odtwarzania na wyświetlaczu LCD.</p> <p><b>Zawsze na wierzchu</b><br/>Sprawia, że program File Player jest wyświetlany zawsze ponad innymi aplikacjami.</p> <p><b>Automatyczne ukrywanie przycisków sterujących przy pełnym ekranie</b><br/>Powoduje automatyczne ukrywanie przycisków w trybie pełnoekranowym, jeśli użytkownik nie wykonuje żadnych czynności. Przyciski pojawiają się ponownie w momencie poruszenia myszą.</p> <p><b>Zachowaj współczynnik kształtu obrazu</b><br/>Powoduje zachowanie proporcji (stosunku szerokości do wysokości obrazu) przy zmianie rozmiarów wyświetlacza.</p> |
| <b>Tryb czasu</b>           | Pozwala ustawić tryb czasu: czas <b>Wykorzystany</b> , czas <b>Pozostały</b> lub czas <b>Łączny</b> .                                                                                                                                                                                                                                                                                                                                                                                                                                                                                                                                                                         |
| <b>Podpowiedzi narzędzi</b> | <p><b>Wyświetlaj podpowiedzi narzędzi</b><br/>Wyświetla podpowiedzi pomagające w korzystaniu z narzędzi programu File Player.</p> <p><b>Wyświetlaj skróty klawiaturowe</b><br/>Powoduje wyświetlanie klawiszy skrótu.</p>                                                                                                                                                                                                                                                                                                                                                                                                                                                     |

## Ustawienia preferencji programu File Player

Okno ustawień Preferencje pozwala określić parametry zarządzania poborem mocy.

|                                 |                                                                                                                                      |
|---------------------------------|--------------------------------------------------------------------------------------------------------------------------------------|
| <b>Zarządzanie poborem mocy</b> | Wybierz jeden z poniższych poziomów:                                                                                                 |
|                                 | <b>Zawsze</b><br>Zarządzanie poborem mocy jest zawsze aktywne.                                                                       |
|                                 | <b>Wyłączone przy odtwarzaniu</b><br>Zarządzanie poborem mocy jest wyłączone w trakcie odtwarzania dysku CD.                         |
|                                 | <b>Pozwól na wyłączenie wyświetlania przy wstrzymaniu odtwarzania</b><br>Przy wstrzymaniu odtwarzania wyłączony zostaje wyświetlacz. |
|                                 | <b>Wyłączone</b><br>Zarządzanie poborem mocy jest na stałe wyłączone.                                                                |

## Ustawienia galerii obrazów statycznych programu File Player

Program File Player pozwala na przechwytywanie klatek.

### Aby wyświetlić okno ustawień galerii obrazów statycznych programu File Player

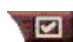

Naciśnij przycisk Ustawienia na panelu sterowania programu File Player, a następnie wybierz kartę **Galeria obrazów statycznych**. Informacje na temat galerii obrazów statycznych zawiera rozdział *Galeria obrazów statycznych* na stronie 55.

## Ustawienia Terminarza programu File Player

Program File Player może odtwarzać pliki multimedialne w określonym dniu i godzinie. W przypadku zainstalowania odpowiednich programów, zdarzenia w terminarzu można planować także dla CD Audio, TV Magazine, Magnetowidu cyfrowego i TV.

### Aby programować zdarzenia w terminarzu

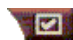

Naciśnij przycisk Ustawienia na panelu sterowania programu File Player, a następnie wybierz kartę **Terminarz**. Kreator inicjalizacji Terminarza pomoże przy tworzeniu nowych zaplanowanych zdarzeń. Więcej informacji podano w rozdziale *Terminarz* na stronie 83.

## Terminarz

Narzędziem Terminarza można programować włączanie zdarzeń w określonych dniach i godzinach. Można zaprogramować zdarzenia dla CD Audio, TV Magazine, Magnetowidu cyfrowego, programu File Player i TV.

### Aby zaprogramować zdarzenia

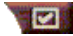

Naciśnij przycisk Ustawienia na panelu sterowania programu DVD, TV, CD Audio lub File Player. Kliknij kartę **Terminarz** a następnie naciśnij przycisk **Utwórz nowy**.

Kreator Terminarza pomoże w programowaniu nowych zdarzeń. Podczas Kroku 4 tej procedury Kreator zapyta, czy powinien ustawić parametry specyficzne dla danego narzędzia (na przykład przy nagrywaniu wideo można określić ustawienia jakości nagrywania i czas trwania danego zdarzenia). Po naciśnięciu przycisku **Zakończ** dane zdarzenie jest dodawane do listy zaprogramowanych zdarzeń, a pozycje zaznaczone są pozycjami aktywnymi.

## Ustawienia Terminarza

|                              |                                                                                                                   |
|------------------------------|-------------------------------------------------------------------------------------------------------------------|
| <b>Nazwa</b>                 | Nazwa zdarzenia. Zaznaczone zdarzenia są aktywne.                                                                 |
| <b>Narzędzie</b>             | Narzędzia do zaprogramowania: CD Audio, File Player , TV, Magazyn TV, Przechwytywanie obrazu wideo oraz Video CD. |
| <b>Kiedy</b>                 | Kiedy zdarzenie występuje.                                                                                        |
| <b>Następne uruchomienie</b> | Kiedy będzie miało miejsce następne uruchomienie zdarzenia.                                                       |
| <b>Modyfikuj</b>             | Kliknij, aby zmienić wartości dla zaprogramowanego zdarzenia.                                                     |
| <b>Skasuj</b>                | Usuń zaprogramowane zdarzenie.                                                                                    |
| <b>Skasuj wszystko</b>       | Usuń wszystkie zaprogramowane zdarzenia.                                                                          |

- Zdarzenia, których data uruchomienia (miesiąc i dzień) już minęła, nie są automatycznie usuwane. Aby ponownie uaktywnić zdarzenie, ustaw jego miesiąc i dzień na dziś lub datę późniejszą.
- Jeżeli strona ustawień jest otwarta lub jeżeli otwarte jest okno informacji o Pomocy, to Terminarz nie może przetwarzać zdarzeń. Jeżeli zdarzenie wystąpi, to wyświetlone zostanie okno dialogowe z ostrzeżeniem, że dane zdarzenie nie zostało przetworzone.
- Jeżeli przy pierwszym uruchomieniu Multimedia Center są jakieś nagrane zaprogramowane zdarzenia a Terminarz nie jest uruchomiony, to wyświetlone zostanie okno dialogowe z ostrzeżeniem, że zaprogramowane zdarzenia nie zostaną przetworzone.

Możesz uruchomić Terminarz od razu i/lub zainstalować go w pliku startowym (Startup) systemu Windows, tak aby był uruchamiany za każdym razem, gdy startuje Windows. Gdy klikniesz OK po dodaniu pozycji do zaprogramowanej listy oglądania, to zostanie wyświetlone okno dialogowe z ostrzeżeniem.

## TV Out

Obraz z komputera można wyświetlać na ekranie telewizora i oglądać obrazy wyświetlane przez narzędzia grupy Multimedia Center bezpośrednio na telewizorze w formacie NTSC lub PAL, podłączonym przez wyjście sygnału Composite lub S-Video, albo wyświetlać obrazy jednocześnie na ekranie TV i monitora.

TV Out pozwala na wyświetlanie na dużym ekranie obrazu aplikacji takich jak gry, prezentacje, filmy lub przeglądarki Internetu.

### **Uwaga**

Przed włączeniem wysyłania sygnału TV należy podłączyć telewizor. Więcej informacji o podłączaniu telewizora można znaleźć w Instrukcji obsługi karty ATI.

### **Aby włączyć wyświetlanie na telewizorze**

- 1** Na pasku zadań Windows naciśnij **Start**.
- 2** Wskaż **Ustawienia ►**, a następnie wybierz **Panel sterowania**.
- 3** Kliknij dwukrotnie **Wyświetlanie**.
- 4** Wybierz kartę **Ustawienia**.
- 5** Naciśnij **Zaawansowane...**
- 6** Naciśnij **Wyświetlacze**.
- 7** Zaznacz pole wyboru **Telewizja**.
- 8** Naciśnij **OK**.

Aby wyłączyć wyświetlanie na telewizorze, trzeba wycyścić pole wyboru Telewizja.

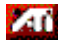

*Aby uzyskać więcej informacji o wyświetlaniu na telewizorze, naciśnij Pomoc.*

## Obsługa wielu monitorów

Karty ATI RADEON VE ze zintegrowanym oprogramowaniem HydraVision™ umożliwiają podłączenie wielu monitorów do systemu komputerowego. Możliwe jest wyświetlanie obrazu na monitorze komputerowym, wyświetlaczu płaskim oraz telewizorze w różnych konfiguracjach.

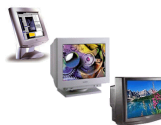

Karty ATI RADEON VE pozwalają na wyświetlanie na obrazu z DVD, File Player oraz Video CD na wielu monitorach. Szczegóły zamieszczono w *RADEON VE Installation and Setup User's Guide*.

## Teletext

Nowa aplikacja Teletext firmy ATI pozwala maksymalnie wykorzystać możliwości teletekstu. ATI Teletext eliminuje dobrze wszystkim znane wady teletekstu w telewizji, umożliwiając swobodne poruszanie się w obrębie wszystkich stron. Wyczerpujące instrukcje dotyczące instalacji i obsługi programu zawiera *Podręcznik użytkownika ATI Teletext*.

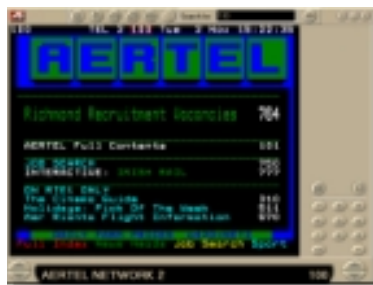

**Uwaga** Funkcja teletekstu jest dostępna tylko w Europie.

## Rozwiązywanie problemów

Poniższe wskazówki mogą okazać się przydatne w przypadku wystąpienia problemów z obrazem lub dźwiękiem.

### Problemy z dźwiękiem ...

#### Brak dźwięku

*Sprawdź głośniki:*

- Jeśli system wyposażony jest w głośniki zewnętrzne, sprawdź, czy zostały one włączone (zapalona dioda zasilania) i czy są podłączone do gniazda LINE-OUT lub SPEAKER OUT karty dźwiękowej.

#### Nadal brak dźwięku?

*Odtwórz dźwiękowy plik .WAV:*

- 1 Kliknij przycisk **Start**, wskaż pozycję **Ustawienia** ►, wybierz polecenie **Panel sterowania** i kliknij dwukrotnie ikonę **Dźwięki**.
- 2 Na liście **Zdarzenia** kliknij pozycję **Gwiazdka**, a następnie kliknij jeden z plików .WAV na liście **Dźwięk**.
- 3 Kliknij przycisk odtwarzania ► by odtworzyć dźwięk.

*Jeżeli nie słyszysz dźwięku, otwórz okno Regulacja głośności:*

- Kliknij przycisk **Start**, wskaż pozycję **Programy** ►, wskaż **Akcesoria** ►, wskaż **Multimedia** ► i wybierz polecenie **Regulacja głośności**.  
Ewentualnie kliknij prawym przyciskiem myszy ikonę głośnika  (zwykle umieszczoną w prawym dolnym rogu ekranu), po czym wybierz polecenie **Otwórz Regulację głośności**.

Jeżeli na pasku zadań nie ma ikony głośnika, wykonaj poniższe czynności:

- Na pasku zadań Windows kliknij przycisk **Start**, wskaż pozycję **Ustawienia**, po czym wybierz polecenie **Panel sterowania**.
  - Kliknij dwukrotnie ikonę **Multimedia**.
  - Na karcie **Audio** zaznacz opcję **Pokaż wskaźnik głośności na pasku zadań**.
- Sprawdź, czy główny **regulator głośności** oraz kanał **Wave** nie są wyciszone lub ustawione bardzo cicho. Sprawdź też, czy nie jest wyciszony kanał **MIDI** (lub syntezatora).

*Jeśli z głośników dochodzi dźwięk, wiadomo, że są one sprawne.*

- Jeżeli nadal występują kłopoty z dźwiękiem, sprawdź połączenia sygnału audio z kartą ALL-IN-WONDER 128.

### Brak dźwięku w TV

*Sprawdź, czy połączenie między kartą ALL-IN-WONDER 128 lub ALL-IN-WONDER RADEON a kartą dźwiękową jest prawidłowe.*

- Wyczerpujące instrukcje instalacji zawiera podręcznik instalacji i konfiguracji karty ALL-IN-WONDER 128 / ALL-IN-WONDER 128 PRO / ALL-IN-WONDER RADEON.

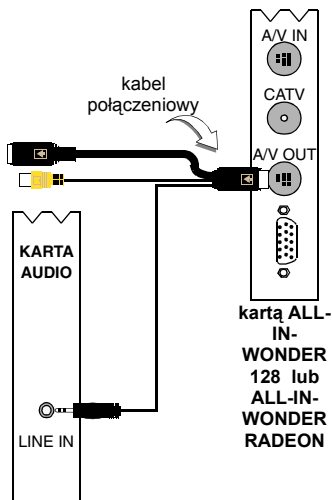



## Nie można nagrać dźwięku

*Sprawdź ustawienia miksera nagrywania:*

- 1 Kliknij przycisk **Start**, wskaż pozycję **Programy** ►, wskaż **Akcesoria** ►, wskaż pozycję **Multimedia** ► i wybierz polecenie **Regulacja głośności**.  
Ewentualnie kliknij prawym przyciskiem myszy ikonę głośnika (zwykle umieszczoną prawym dolnym rogu ekranu), po czym wybierz polecenie **Otwórz Regulację głośności**.
- 2 W menu okna **Regulacja głośności** kliknij menu **Opcje**, kliknij polecenie **Właściwości**, włącz opcję **Nagrywanie** i kliknij przycisk **OK**. Wyświetlone zostanie okno **Regulacja nagrywania**.
- 3 Sprawdź, czy zaznaczona jest opcja **Line** (lub opcja innego wejścia audio, wybranego w Kreatorze inicjalizacji dźwięku, co opisano na [stronie 13](#)), po czym kliknij przycisk **X**, by zamknąć okno dialogowe.

## Brak dźwięku przy nagrywaniu z kasyety wideo.

*Podłącz wyjście audio w magnetowidzie z komputerem:*

- Wyjścia lewego i prawego kanału audio w magnetowidzie muszą być podłączone do gniazd karty ALL-IN-WONDER 128 lub ALL-IN-WONDER RADEON (należy zauważyć, że złącze S-Video nie zawiera złączy dla sygnału audio). Wyczerpujące instrukcje instalacji zawiera podręcznik *instalacji i konfiguracji dla kart ALL-IN-WONDER 128 / ALL-IN-WONDER 128 PRO / ALL-IN-WONDER RADEON*.

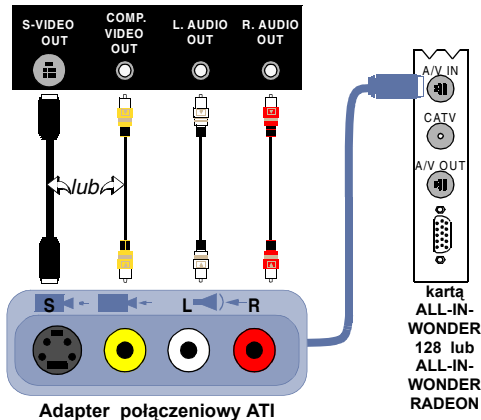

## Brak dźwięku przy nagrywaniu z komputera na magnetowidzie

Podłącz wyjście audio komputera do wejścia magnetowidu:

- Wejścia lewego i prawego kanału audio w magnetowidzie muszą być podłączone do gniazd karty ALL-IN-WONDER 128 lub ALL-IN-WONDER RADEON (należy zauważyć, że złącze S-Video nie zawiera złączy dla sygnału audio). Wyczerpujące instrukcje instalacji zawiera podręcznik *instalacji i konfiguracji dla kart ALL-IN-WONDER 128 / ALL-IN-WONDER 128 PRO / ALL-IN-WONDER RADEON*.

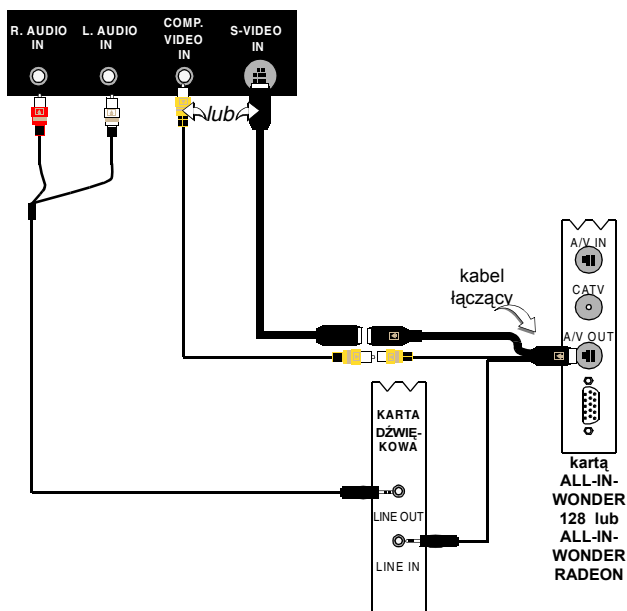

## Problemy z obrazem...

### Obraz jest niestabilny lub tylko czarno-biały

Sprawdź, czy wybrano właściwy format nadawania:

- Patrz punkt *Standard nadawania* w rozdziale *Ustawienia obrazu TV* na stronie 17. Aby zapewnić prawidłowe funkcjonowanie programu, należy zdefiniować odpowiedni kraj w *Kreatorze inicjalizacji kanałów TV* (na *stronie 13*).
- Sprawdź jakość źródłowego sygnału telewizyjnego na innym odbiorniku. Przyczyną może być zła jakość odbioru.

### Brak dźwięku lub obrazu

- Sprawdź, czy nie nastąpiło rozłączenie kabla lub anteny.
- Sprawdź, czy złącze wideo jest dopasowane do źródła (patrz **Złącze** w rozdziale *Ustawienia obrazu TV* na stronie 17).
- Sprawdź, czy złącza audio i wideo są prawidłowo podłączone do odpowiednich gniazd.
- Sprawdź, czy karta wideo jest prawidłowo wetknięta do gniazda na płycie komputera. Instrukcje na temat montażu karty zawiera podręcznik użytkownika.



# Indeks

## A

**ATI TV Bar** 22

przyciski sterujące 22

**Automatyczne wyszukiwanie** 18

## B

**baza danych CD** 59

**blokada programu**

hasło 32

**blokady programu**

Kreator 32

## C

**CD Audio** 57

baza danych CD 59

ustawienia 58

ustawienia Terminarza 60

**Cyfrowy magnetowid**

kodowanie MPEG w czasie

rzeczywistym 41

optymalne wyniki przy nagrywaniu

MPEG 42

## D

**drugorzędna ścieżka dźwiękowa** 30

**DVD** 67

kody regionów 77

korzystanie z menu 70

menu sterowania 72

powiększanie i przesuwanie obrazu

71

preferencje 74

przeszukiwanie dysków DVD 70

przyciski przy wyświetlaniu na

pełnym ekranie 68

ustawienia napisów 69

ustawienia napisów kodowanych 75

ustawienia Terminarza 76

ustawienia wideo 75

ustawienia wyświetlania 73

wybieranie kanałów audio 69

wybór kąta widzenia 70

Zabezpieczenia przed dziećmi 71

**dźwięk problemy** 87

## E

**eksportowanie wideo przesuniętego w czasie** 38

## F

**File Player** 78

Galeria obrazów statycznych 55, 82

Kreator terminarza 82

menu sterowania 79

powiększanie i przesuwanie obrazu

80

preferencje 82

ustawienia Terminarza 82

ustawienia wyświetlania 81

## G

**Galeria obrazów statycznych** 55

ustawienia 55

## H

**HotWords**

konfigurowanie 26

kreator 27

## I

**inicjalizacja**

kreator 13

## J

**jakość nagrywania** 40

## K

**kanały**

audio w DVD 69

przeskakiwanie 23

**Karaoke CD** 61

**kąt widzenia**

wybór 70

**klatki przechwytywanie** 34  
**kodowanie MPEG w czasie rzeczywistym** 41  
**kody regionów** 77  
**konflikt zasobów** 8  
**Kreator** 82  
    blokada programu kreator 32  
    inicjalizacji dźwięku 13  
    Terminarza 83  
    zabezpieczenia przed dziećmi 13  
**kreator**  
    HotWords 27  
    Terminarz TV 21  
    TV Magazine 25, 28  
    TV-on-Demand 14  
**kreator HotWords** 27  
**Kreator inicjalizacji** 13  
    TV 13  
**Kreator inicjalizacji dźwięku** 13  
**Kreator inicjalizacji kanałów TV** 13  
**Kreator przechwytywania** 40, 41  
**Kreator terminarz**  
    File Player 82  
**Kreator Terminarza**  
    TV 21  
**Kreator terminarza**  
    TV 21  
**kreator TV Magazine** 25

**L**

**LaunchPad**  
    uruchamianie Multimedia Center 8

**M**

**Magnetowid cyfrowy**  
    konfigurowanie 39  
    Kreator przechwytywania 41  
    ustawienia 40

**menu**  
    korzystanie w DVD 70

**menu sterowania**  
    DVD 72  
    File Player 79  
    TV 15  
    Video CD 62

**MPEG**  
    dobór parametrów nagrywania 41  
    kodowanie w czasie rzeczywistym 41  
    optymalne wyniki przy nagrywaniu 42

**Multimedia Center**  
    korzystanie 7  
    uruchamianie 8

## **N**

### **napisy**

    ustawienia w DVD 69

### **napisy kodowane**

    transkrypcja tekstu 28

    ustawienia 24, 75

**Natychmiastowe powtarzanie** 36

**Nazwa kanału** 18

## **O**

**Obsługa wielu monitorów** 86

## **P**

### **panele sterowania**

    przyłączanie i odłączanie 9

### **Parental Control**

    Kreator 13

**Paauza na żywo** 36

**podpowiedzi narzędzi** 10

### **Pomoc**

    funkcje, kontekstowa, podpowiedzi

    narzędzi, pulpit 10

**powiększanie i przesuwanie obrazu**

30

    DVD 71

    File Player 80

    Video CD 63

### **problemy**

    dźwięk 87

    połączenie dźwiękowe z

    magnetowidem 89

    połączenie z kartą dźwiękową 88

    wideo 87

**przechwytywanie**

    kreator 40, 41

**przechwytywanie wideo i klatek**  
zapisywanie i kompresja  
przechwyconego wideo 39  
**przechwytywanie wideo i obrazów**  
**statycznych** 34  
**przegląd** 11  
**Przeskakiwanie między kanałami** 23  
**przyłączanie i odłączanie paneli** 9  
**pulpit wideo** 31

## **R**

**RADEON VE** 86  
**ramki I** 42  
**ramki I, B, P** 42  
**rozmiar ekranu TV** 14

## **S**

**SAP** 30  
**Standard sygnału** 18

## **T**

**Teletext** 86  
**Terminarz**  
CD Audio 60  
DVD 76  
kreator 83  
**Terminarza**  
ustawienia 84  
**transkrypcja tekstu napisów**  
**kodowanych** 28  
**tuner**  
ustawienia TV 18  
**TV**  
blokada programu 32  
drugorzędna ścieżka dźwiękowa 30  
Galeria obrazów statycznych 55  
HotWords 26  
konfigurowanie 13  
Kreator inicjalizacji 13  
Kreator inicjalizacji kanałów 13  
Magnetowid cyfrowy 39  
menu sterowania 15  
Nagrywanie klipu z obrazem i  
dźwiękiem z odtwarzacza TV  
35

powiększanie i przesuwanie obrazu  
30  
przechwytywanie wideo i obrazów  
statycznych 34  
Przeskakiwanie między kanałami  
23  
pulpit wideo 31  
rozmiar ekranu 14  
TV Bar 22  
TV Listings 44  
TV Magazine 28  
TV-on-Demand 36  
uruchamianie z paska LaunchPad  
11  
ustawienia galerii obrazów  
statycznych 21  
ustawienia napisów kodowanych 24  
ustawienia Terminarza 21  
ustawienia tunera 18  
ustawienia wideo 17  
ustawienia wyświetlania 16  
Zaawansowane parametry kanałów  
18  
Zabezpieczenie przed dziećmi 33  
zapisywanie i kompresja  
przechwyconego wideo 39  
**TV Bar** 22  
**TV Listings** 44  
dni i daty 54  
Favorite Search 49  
konfiguracja, rejestracja, ściągania  
aktualnych list,  
dostosowywanie kanałów,  
aktualizacja list 45  
nagrywanie programów 46  
nawigacja 46  
opcje Filter 48  
Searches 49  
skorzystać z informacji z programu  
TV 44  
uruchomić 44  
ustawianie parametrów  
wyszukiwania 52  
widoki, Grid, Log 47  
wyświetlanie programów 47  
Zakładka Actors 48

- Zakładka Categories 49
- Zakładka Movies 50
- Zakładka schedules 51
- Zakładka Searches 51
- Zakładka Sports 53
- Zakładka Stations 53
- Zakładka Titles 54

### **TV Magazine**

- konfigurowanie 28
- kreator 25, 28
- uruchamianie 28

### **TV Out 85**

#### **TV-on-Demand 14, 36**

- eksportowanie wideo 38
- kreator inicjalizacja 14
- Natychmiastowe powtarzanie 36
- odtworzyć wideo 37
- Pauza na żywo 36
- przechodzenie do przodu i do tyłu w wideo 37
- przemieszczać się w obrębie przesuniętego w czasie wideo 38
- wyświetlanie przesuniętego wideo 36
- zatrzymywanie wideo 37
- zmiana szybkości odtwarzania 37

## **U**

**uruchamianie Multimedia Center 8**

**uruchamianie z paska zadań 11**

### **ustawienia**

- CD Audio 58
- DVD 75
- ekran DVD 73
- ekran TV 16
- File Player 81
- Galeria obrazów statycznych 55
- Galeria obrazów statycznych File Player 82
- Galeria obrazów statycznych Video CD 66
- galeria obrazów statycznych w TV 21

- HotWords 26
- Magnetowid cyfrowy 40
- nagrywanie MPEG 41
- napisy kodowane 24, 75
- preferencje DVD 74
- preferencje File Player 82
- Terminarz File Player 82
- Terminarza 84
- Tuner TV 18
- tuner TV 18
- Video CD 64
- wideo w TV 17

## **V**

### **Video CD**

- Galeria obrazów statycznych 55, 66
- menu sterowania 62
- powiększanie i przesuwanie obrazu 63
- przechwytywanie klatek 63
- ustawienia wyświetlania 64
- Video CD 1.0, Karaoke CD 61

### **Video CD 1.0 61**

### **Video-In 12**

## **W**

### **wideo**

- optymalne wyniki przy nagrywaniu MPEG 42
- ustawienia w TV 17

### **wideo problemy 87**

### **wideo przechwytywanie 34**

## **Z**

### **Zaawansowane parametry kanałów**

18

### **zabezpieczenia przed**

hasła 13

### **Zabezpieczenia przed dziećmi**

DVD 71

### **Zabezpieczenia przed dziećmi DVD**

71

### **Zabezpieczenie przed dziećmi 33**
